# Supplementary material for: Identification of the first structurally validated covalent ligands of the small GTPase RAB27A
Source: Royal Society of Chemistry journal article supplement (doi:10.1039/d1md00225b), 2021-12-16
Supplement: d1md00225b2.pdf [file d1md00225b2.pdf]

## SUPPORTING INFORMATION

### Identification of the first structurally validated covalent ligands of the small GTPase RAB27A

Mostafa Jamshidiha,<sup>[a,b]#</sup> Thomas Lanyon-Hogg,<sup>[a,b]#</sup> Charlotte L. Sutherell,<sup>[b]</sup> Gregory B. Craven,<sup>[a]</sup> Montse Tersa,<sup>[a]</sup> Elena De Vita,<sup>[b]</sup> Delia Brustur,<sup>[b]</sup> Inmaculada Pérez-Dorado,<sup>[a]</sup> Sarah Hassan,<sup>[b]</sup> Rita Petracca,<sup>[b]</sup> Rhodri M. Morgan,<sup>[a]</sup> Máximo Sanz-Hernández,<sup>[a]</sup> Jim C. Norman,<sup>[c]</sup> Alan Armstrong,<sup>[b]</sup> David J. Mann,<sup>[a]</sup> Ernesto Cota,<sup>\*[a]</sup> and Edward W. Tate<sup>\*[b]</sup>

---

[a] Dr M. Jamshidiha, Dr M. Tersa, Dr I. Perez-Dorado, Dr G. B. Craven, Dr R. M. Morgan, Dr M. Sanz-Hernández, Dr D. J. Mann, Dr E. Cota  
Department of Life Sciences  
Imperial College London  
London, SW7 2AZ, UK  
Email: [e.cota@imperial.ac.uk](mailto:e.cota@imperial.ac.uk)

[b] Dr T. Lanyon-Hogg, Dr C. L. Sutherell, Dr E. De Vita, D. Brustur, S. Hassan, Dr R. Petracca, Prof A. Armstrong, Prof E. W. Tate  
Department of Chemistry  
Imperial College London  
London, W12 0BZ, UK  
Email: [e.tate@imperial.ac.uk](mailto:e.tate@imperial.ac.uk)

[c] Prof J. C. Norman  
Beatson Institute for Cancer Research  
Garscube Estate  
Glasgow G61 1BD, UK

# These authors contributed equally

Keywords: Rab27A, Protein-Protein interactions, Ligand screening, Covalent inhibitors, X-ray crystallography,

|                                                               |           |
|---------------------------------------------------------------|-----------|
| <b>SUPPORTING INFORMATION</b>                                 | <b>1</b>  |
| <b>Supplementary Figures</b>                                  | <b>3</b>  |
| <i>Figure S1</i>                                              | 3         |
| <i>Figure S2</i>                                              | 4         |
| <i>Figure S3</i>                                              | 5         |
| <i>Figure S4</i>                                              | 14        |
| <i>Figure S5</i>                                              | 15        |
| <i>Figure S6</i>                                              | 16        |
| <i>Figure S7</i>                                              | 17        |
| <i>Figure S8</i>                                              | 18        |
| <b>Supplementary Tables</b>                                   | <b>19</b> |
| <i>Table S1</i>                                               | 19        |
| <i>Table S2</i>                                               | 20        |
| <i>Table S3</i>                                               | 21        |
| <i>Table S4</i>                                               | 22        |
| <b>Materials and Methods</b>                                  | <b>23</b> |
| <i>Protein expression and purification</i>                    | 23        |
| <i>Protein labelling and purification</i>                     | 23        |
| <i>Protein crystallisation</i>                                | 24        |
| <i>Molecular dynamics simulations</i>                         | 24        |
| <i>qIT assay for screening and hit validation</i>             | 24        |
| <i>qIT assay for <math>k_{inact}/K_i</math> determination</i> | 25        |
| <i>Peptide mass fingerprint analysis</i>                      | 25        |
| <b>Chemical Synthesis</b>                                     | <b>26</b> |
| <i>Abbreviations</i>                                          | 26        |
| <i>General Information</i>                                    | 26        |
| <i>Scheme S1. Synthesis of hit fragment A01</i>               | 26        |
| <i>Scheme S2. Synthesis of hit fragment B01</i>               | 29        |
| <b>NMR spectra for A01 and B01</b>                            | <b>32</b> |
| <b>Supplementary References</b>                               | <b>37</b> |

## Supplementary Figures

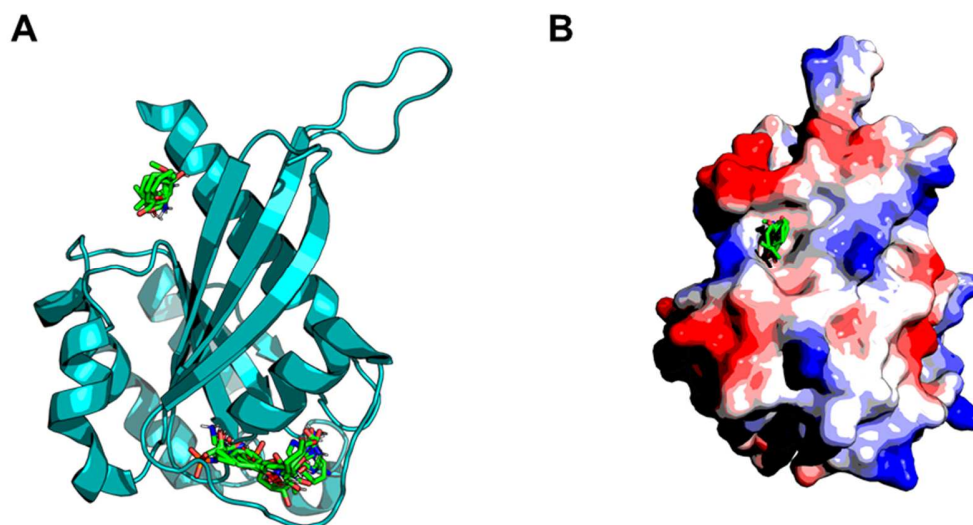

**Figure S1.** Evaluating Rab27A (PDB: 3BC1, chain A) hotspots using FTMap server.<sup>1</sup> This server identifies binding pockets within a protein surface by evaluating binding energy of molecules with different physicochemical properties. A) and B) demonstrate that organic molecule clusters predominantly occupy the nucleotide binding site and the WF pocket.

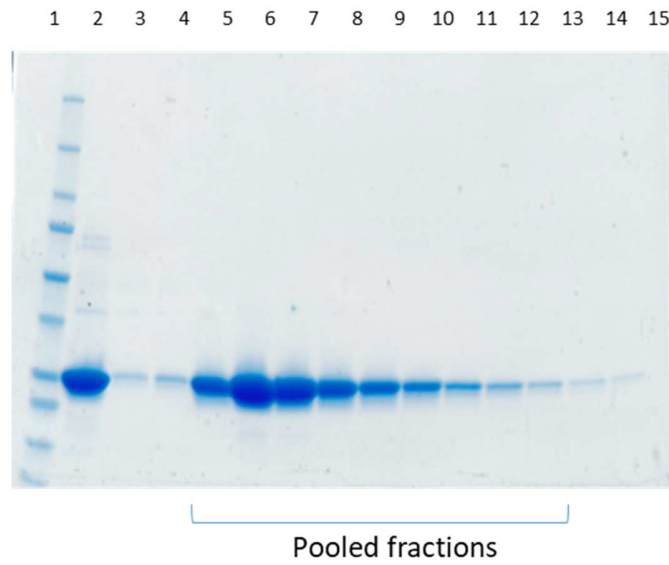

**Figure S2.** Last purification step for fRab27A-C188. Size-exclusion chromatography (SEC) fractions A10 to B8 were pooled to obtain pure recombinant protein. Gel lanes: 1. ladder; 2. SEC input; SEC fractions: 3. A8; 4. A9; 5. A10; 6. A11; 7. B1; 8. B3; 9. B4; 10. B5; 11. B6; 12. B7; 13. B8; 14. B9; 15. B10.

**A**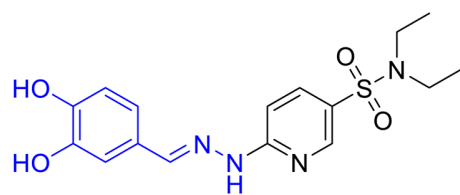**BMD-11****B**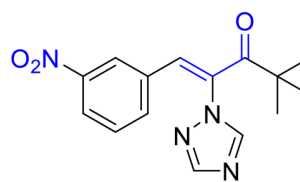**Nexinhib 20**

**Figure S3.** Structure of reported Rab27A non-covalent inhibitors: BMD-11<sup>2</sup> and Nexinhib 20<sup>3</sup>. Motifs commonly associated with PAINS are highlighted in blue, such as catechols and vinyl ketones.<sup>4</sup>

|            |                                                             |    |
|------------|-------------------------------------------------------------|----|
| RAB27A     | -----                                                       | 0  |
| RAB27B     | -----                                                       | 0  |
| RAB24      | -----                                                       | 0  |
| RAB6C      | -----                                                       | 0  |
| RAB6D      | -----                                                       | 0  |
| RAB6A      | -----                                                       | 0  |
| RAB6B      | -----                                                       | 0  |
| RAB17      | -----MAQ-----                                               | 3  |
| RAB21      | -----MAA-----                                               | 3  |
| RAB5B      | -----MT-----                                                | 2  |
| RAB5A      | -----MA-----                                                | 2  |
| RAB5C      | -----MAG-----                                               | 3  |
| RAB22A     | -----                                                       | 0  |
| RAB22B(31) | -----                                                       | 0  |
| RAB20      | -----                                                       | 0  |
| RAB28      | -----                                                       | 0  |
| RAB29      | -----                                                       | 0  |
| RAB32      | -----MAGGGAGDPG-----LG                                      | 12 |
| RAB38      | -----                                                       | 0  |
| RAB34      | -----                                                       | 0  |
| RAB36      | MVIAGASWMLGRAAA--SPTQTPPTTSTIRVARRSRVALVAMVIAAAGSGGPGRAPQLS | 58 |
| RAB42      | -----                                                       | 0  |
| RAB39A     | -----                                                       | 0  |
| RAB39B     | -----                                                       | 0  |
| RAB7B      | -----                                                       | 0  |
| RAB7A      | -----                                                       | 0  |
| RAB9A      | -----                                                       | 0  |
| RAB9B      | -----                                                       | 0  |
| RAB23      | -----                                                       | 0  |
| RAB40C     | -----                                                       | 0  |
| RAB40B     | -----                                                       | 0  |
| RAB40A     | -----                                                       | 0  |
| RAB40AL    | -----                                                       | 0  |
| RAB33A     | -----MAQPILGHGSLQPA----S                                    | 15 |
| RAB33B     | -----MAEEMES--SLE-A----S                                    | 12 |
| RAB30      | -----                                                       | 0  |
| RAB19      | -----                                                       | 0  |
| RAB43      | -----                                                       | 0  |
| RAB18      | -----                                                       | 0  |
| RAB2A      | -----                                                       | 0  |
| RAB2B      | -----                                                       | 0  |
| RAB14      | -----                                                       | 0  |
| RAB4A      | -----                                                       | 0  |
| RAB4B      | -----                                                       | 0  |
| RAB25      | -----                                                       | 0  |
| RAB11A     | -----                                                       | 0  |
| RAB11B     | -----                                                       | 0  |
| RAB12      | -----MDPG----AALQRRAGGGGGLGAGSPALS                          | 25 |
| RAB26      | -----MSRKKTPKSKGASTPAASTLPTANG----ARPARS--GTALSGPDAPPNG     | 44 |
| RAB37      | -----MTGTPG----AVATRD--GE-----APERS                         | 19 |
| RAB3D      | -----M-----                                                 | 1  |
| RAB3B      | -----M-----                                                 | 1  |
| RAB3A      | -----M-----                                                 | 1  |
| RAB3C      | -----MRHEAPMQM-----                                         | 9  |
| RAB15      | -----                                                       | 0  |
| RAB13      | -----                                                       | 0  |
| RAB10      | -----                                                       | 0  |
| RAB8A      | -----                                                       | 0  |
| RAB8B      | -----                                                       | 0  |
| RAB35      | -----                                                       | 0  |
| RAB1A      | -----                                                       | 0  |
| RAB1B      | -----                                                       | 0  |

|            |                                                                |     |
|------------|----------------------------------------------------------------|-----|
| RAB27A     | -----MSDG                                                      | 4   |
| RAB27B     | -----MTDG                                                      | 4   |
| RAB24      | -----MS                                                        | 2   |
| RAB6C      | -----MSAGGDFG                                                  | 8   |
| RAB6D      | -----MSAGGDFG                                                  | 8   |
| RAB6A      | -----MSTGGDFG                                                  | 8   |
| RAB6B      | -----MSAGGDFG                                                  | 8   |
| RAB17      | -----AHR--TPQPRAAP                                             | 14  |
| RAB21      | -----AGG--GGGAAAA                                              | 14  |
| RAB5B      | -----SRSTARPNQPPQA                                             | 15  |
| RAB5A      | -----SRGATRPNGPNTG                                             | 15  |
| RAB5C      | -----RGGAARPNPAAAG                                             | 16  |
| RAB22A     | -----                                                          | 0   |
| RAB22B(31) | -----                                                          | 0   |
| RAB20      | -----                                                          | 0   |
| RAB28      | -----MSDSEE                                                    | 7   |
| RAB29      | -----MG                                                        | 2   |
| RAB32      | -----AAAAPAPE                                                  | 20  |
| RAB38      | -----MQAP                                                      | 4   |
| RAB34      | -----MNILAPVRRDRVLAELPQCLRKEAALHGKDFHPRVTCACQEHTGT             | 47  |
| RAB36      | QPSLDCGRMRSSLTPLGPPVSRDRVIASF PKWYTP EACLQLREHFHGQVSAACQRRNTGT | 118 |
| RAB42      | -----MEAE                                                      | 4   |
| RAB39A     | -----MET                                                       | 3   |
| RAB39B     | -----MEA                                                       | 3   |
| RAB7B      | -----MNP                                                       | 3   |
| RAB7A      | -----MTS                                                       | 3   |
| RAB9A      | -----MA                                                        | 2   |
| RAB9B      | -----MS                                                        | 2   |
| RAB23      | -----MLEE                                                      | 4   |
| RAB40C     | -----MG-----SQGSPVK                                            | 9   |
| RAB40B     | -----MS-----ALGSPVR                                            | 9   |
| RAB40A     | -----MS-----APGSPDQ                                            | 9   |
| RAB40AL    | -----MS-----APGSPDQ                                            | 9   |
| RAB33A     | AAGLASLEL-----DSSLDQY                                          | 31  |
| RAB33B     | FSSSGAVSG-----ASGFLPP                                          | 28  |
| RAB30      | -----MSME                                                      | 4   |
| RAB19      | ----MHFSS-----SARAAD                                           | 12  |
| RAB43      | ---MAGPGP-----GPGDPDE                                          | 13  |
| RAB18      | -----MDE                                                       | 3   |
| RAB2A      | -----M                                                         | 1   |
| RAB2B      | -----M                                                         | 1   |
| RAB14      | -----MATAPY                                                    | 6   |
| RAB4A      | -----M-----SQTAMSE                                             | 8   |
| RAB4B      | -----MAE                                                       | 3   |
| RAB25      | -----MGNGTEE                                                   | 7   |
| RAB11A     | -----MGTRDD                                                    | 6   |
| RAB11B     | -----MGTRDD                                                    | 6   |
| RAB12      | --GGQGR-----RRKQPPR                                            | 37  |
| RAB26      | --PLQPGRP-----SLGGGVD                                          | 58  |
| RAB37      | -----P-----PCSP                                                | 24  |
| RAB3D      | ASAGDTQAG-----PRDAADQ                                          | 17  |
| RAB3B      | ASVTDGKTG-----VKDASDQ                                          | 17  |
| RAB3A      | ASATDSRYG-----QKSSDQ                                           | 17  |
| RAB3C      | ASAQDARYG-----QKDSSDQ                                          | 25  |
| RAB15      | -----MAK                                                       | 3   |
| RAB13      | -----MAK                                                       | 3   |
| RAB10      | -----MAKK                                                      | 4   |
| RAB8A      | -----MAK                                                       | 3   |
| RAB8B      | -----MAK                                                       | 3   |
| RAB35      | -----MAR                                                       | 3   |
| RAB1A      | -----MSSMNP                                                    | 6   |
| RAB1B      | -----MNP                                                       | 3   |

|            |                                                              |                         |     |
|------------|--------------------------------------------------------------|-------------------------|-----|
| RAB27A     | DYDYLKFLALGDSGVGKTSVLVYQYTDGKFN-S----                        | KFITTVGIDFREKRVVYRASGPD | 59  |
| RAB27B     | DYDYLKLLALGDSGVGKTTFLRYTDNKNF-P----                          | KFITTVGIDFREKRVVYNAQGP  | 59  |
|            |                                                              |                         |     |
| RAB24      | GQRVDVKKVMLGKEYVGKTSLVERYVHDRFLVG----                        | PYQNTIGAAFAVKVMCV-----  | 52  |
| RAB6C      | NPLRKFKLVFLGEQSVAKTSLITRFRYDSFD-N----                        | TYQAIIGIDFLSKTMYL-----  | 57  |
| RAB6D      | NPLRKFKLVFLGEQSVAKTSLITRFRYDSFD-N----                        | TYQAIIGIDFLSKTMYL-----  | 57  |
| RAB6A      | NPLRKFKLVFLGEQSVGKTSLITRFMYDSFD-N----                        | TYQATIGIDFLSKTMYL-----  | 57  |
| RAB6B      | NPLRKFKLVFLGEQSVGKTSLITRFMYDSFD-N----                        | TYQATIGIDFLSKTMYL-----  | 57  |
| RAB17      | SQPRVFKLVLLGSGSVGKSSLALRYVKNDFK-S----                        | ILPTVGCAFFTQVVDV-----   | 62  |
| RAB21      | GRAYSFKVVLLGEGCVGKTSVLRLYCENKFN-D----                        | KHITTLQASFLTCKLNI-----  | 63  |
| RAB5B      | SKICQFKLVLLGESAVGKSSLVLRVFKGQFH-E----                        | YQESTIGAAFLTQSVCL-----  | 64  |
| RAB5A      | NKICQFKLVLLGESAVGKSSLVLRVFKGQFH-E----                        | FQESTIGAAFLTQTVCL-----  | 64  |
| RAB5C      | NKICQFKLVLLGESAVGKSSLVLRVFKGQFH-E----                        | YQESTIGAAFLTQTVCL-----  | 65  |
| RAB22A     | MALRELKVCLLGDTGVGKSSIWRVFVEDSFD-P----                        | NINPTIGASFMTKTQVY-----  | 49  |
| RAB22B(31) | MAIRELKVCLLGDTGVGKSSIWRVFVEDSFD-P----                        | NINPTIGASFMTKTQVY-----  | 49  |
| RAB20      | MRKPDVSKIVLLGDMNVGKTSLLQRYMERRFP-----                        | DTVSTVGGAFLKQWRS-----   | 48  |
| RAB28      | SQDRQLKIVVLGDGASGKTSLLTTCFAQETFG-K----                       | QYKQTIGLDFLRRITL-----   | 56  |
| RAB29      | SRDHLFKVLVVGDAAVGKTSLVQYRSQDSFS-K----                        | HYKSTVGVDFAKVLQW-----   | 51  |
| RAB32      | TREHLFKVLVIGELGVGKTSIIKRYVHQLFS-Q----                        | HYRATIGVDFALKVLNW-----  | 69  |
| RAB38      | HKEHLYKLLVIGDLGVGKTSIIKRYVHQNFS-S----                        | HYRATIGVDFALKVLHW-----  | 53  |
| RAB34      | VGFKISKVIVVGDLSVGKTCILNRFCKDTFD-K----                        | NYKATIGVDFEMERFEV-----  | 96  |
| RAB36      | VGLKLSKVVVVDLYVGKTSIIHRFCNVFD-R----                          | DYKATIGVDFEIERFEI-----  | 167 |
| RAB42      | GCRYQFRVALLGDAAVGKTSLLRSYVAGAPGAPEPEPEPTVGAECYRRALQL-----    |                         | 58  |
| RAB39A     | IWIYQFRLIVIGDSTVGKSCLLHRFTQGRFPG-LRSPACDPTVGVDFFSRLLLEI----- |                         | 56  |
| RAB39B     | IWLQYFRLIVIGDSTVGKSCLLHRFTQGRFAQ-V----                       | SDPTVGVDFFSRLLVEI-----  | 52  |
| RAB7B      | RKKVDLKLIIVGAIGVGKTSLLHQYVHKTFY-E----                        | EYQTTLGASILSKIIIL-----  | 52  |
| RAB7A      | RKKVLLKKVILGDSGVGKTSMLNQYVNNKFS-N----                        | QYKATIGADFLTKEVMV-----  | 52  |
| RAB9A      | GKSSLFKVLLGDDGVGKSSLMNRYVTNKFD-T----                         | QLFHTIGVEFLNKDLEV-----  | 51  |
| RAB9B      | GKSSLKVLVLLGDDGVGKSSLMNRYVTNKFD-S----                        | QAFHTIGVEFLNRDLEV-----  | 51  |
| RAB23      | DMEVAIKMVVVGNGAVGKSSMIQRYCKGIFT-K----                        | DYKKTIGVDFLERQIQV-----  | 53  |
| RAB40C     | SYDYLLKFLLVGDSVVGKGEILESQDGAAE-S----                         | PYAYSNGIDYKTTTILL-----  | 58  |
| RAB40B     | AYDFLLKFLLVGDSVVGKGEILASLQDGAAE-S----                        | PYGHYPAGIDYKTTTILL----- | 58  |
| RAB40A     | AYDFLLKFLLVGDRDVGKSEILESQDGAAE-S----                         | PYSHLGGIDYKTTTILL-----  | 58  |
| RAB40AL    | AYDFLLKFLLVGDRDVGKSEILESQDGTAE-S----                         | PYSHLGGIDYKTTTILL-----  | 58  |
| RAB33A     | VQIRIFKIIIVIGDSNVGKTCLTRFCGGTFP-D----                        | KTEATIGVDFREKTVEI-----  | 80  |
| RAB33B     | ARSRIKFIIIVIGDSNVGKTCLTRYFCAGRFP-D----                       | RTEATIGVDFRERAVEI-----  | 77  |
| RAB30      | DYDFLFKIVLIGNAGVGKTCVLRFRFTQGLFP-P----                       | GQGATIGVDFMIKTVEI-----  | 53  |
| RAB19      | NFDYLFKIIIVIGDSNVGKTCVQVHFQSGVYT-E----                       | TQNTIGVDFTVRSLDI-----   | 61  |
| RAB43      | QYDFLFKLVVGDASVGKTCVQVRFKTAFA-S-E----                        | RQGSTIGVDFMTKLTLEI----- | 62  |
| RAB18      | DVLTTLKILIIIGESGVGKSSLLRFTDDTFD-P----                        | ELAATIGVDFKVKTISV-----  | 52  |
| RAB2A      | AYAYLFKYIIIGDTGVGKSCLLLQFTDKRFQ-P----                        | VHDLTIGVEFGARMITI-----  | 50  |
| RAB2B      | TYAYLFKYIIIGDTGVGKSCLLLQFTDKRFQ-P----                        | VHDLTIGVEFGARMVNI-----  | 50  |
| RAB14      | NYSYIFKYIIIGDMGVGKSCLLHQFTEKKFM-A----                        | DCPHTIGVEFGTRIIEV-----  | 55  |
| RAB4A      | TYDFLFKFLVIGNAGTGKSCLLHQFIEKKFK-D----                        | DSNHTIGVEFGSKIINV-----  | 57  |
| RAB4B      | TYDFLFKFLVIGSAGTGKSCLLHQFIENKFK-Q----                        | DSNHTIGVEFGSRVNV-----   | 52  |
| RAB25      | DYNFVFKVVLIGESGVGKTNLLSRFTRNEFS-H----                        | DSRTTIGVEFSTRVML-----   | 56  |
| RAB11A     | EYDYLFKVVLLIGDSGVGKSNLLSRFTRNEFN-L----                       | ESKSTIGVEFATRSIQV-----  | 55  |
| RAB11B     | EYDYLFKVVLLIGDSGVGKSNLLSRFTRNEFN-L----                       | ESKSTIGVEFATRSIQV-----  | 55  |
| RAB12      | PADFKLQVIIIGSRGVGKTSLMRFTDDTFC-E----                         | ACKSTVGVDFKIKTVEL-----  | 86  |
| RAB26      | FYDVAFKVMLVGDSGVGKTCVLRFRKDGAFLAG----                        | TFISTVGIDFRNKVLDV-----  | 108 |
| RAB37      | SYDLTGKVMLLGDTGVGKTCFLIQFKDGAFLSG----                        | TFIATVGIDFRNKVVTV-----  | 74  |
| RAB3D      | NFDYMFKLLLIIGNSSVGKTSFLFRYADDSFT-P----                       | AFVSTVGIDFKVKTYYR-----  | 66  |
| RAB3B      | NFDYMFKLLLIIGNSSVGKTSFLFRYADDTFT-P----                       | AFVSTVGIDFKVKTYYR-----  | 66  |
| RAB3A      | NFDYMFKLLLIIGNSSVGKTSFLFRYADDSFT-P----                       | AFVSTVGIDFKVKTYYR-----  | 66  |
| RAB3C      | NFDYMFKLLLIIGNSSVGKTSFLFRYADDSFT-S----                       | AFVSTVGIDFKVKTVFK-----  | 74  |
| RAB15      | QYDVLFRLLLIIGDSGVGKTCVLRFRSDDAFN-T----                       | SHISTIGVDFKMKTIEV-----  | 52  |
| RAB13      | AYDHLFKLLLIIGDSGVGKTCVLRFRFAEDNFN-N----                      | TYISTIGIDFKIRTVDI-----  | 52  |
| RAB10      | TYDLLFKLLLIIGDSGVGKTCVLRFRSDDAFN-T----                       | TFISTIGIDFKIKTVEL-----  | 53  |
| RAB8A      | TYDYLFKLLLIIGDSGVGKTCVLRFRSDDAFN-S----                       | TFISTIGIDFKIRTIEL-----  | 52  |
| RAB8B      | TYDYLFKLLLIIGDSGVGKTCVLRFRSDDAFN-T----                       | TFISTIGIDFKIRTIEL-----  | 52  |
| RAB35      | DYDHLFKLLLIIGDSGVGKSSLLRFADNTFS-G----                        | SYITTIGVDFKIRTVEI-----  | 52  |
| RAB1A      | EYDYLFKLLLIIGDSGVGKSCVLRFRADDTYT-E----                       | SYISTIGVDFKIRTIEL-----  | 55  |
| RAB1B      | EYDYLFKLLLIIGDSGVGKSCVLRFRADDTYT-E----                       | SYISTIGVDFKIRTIEL-----  | 52  |



|            |                                                                 |     |
|------------|-----------------------------------------------------------------|-----|
| RAB27A     | GATGRGQRIHLQLWDTAGQERFR-SLTTAFFRDAMGFLLLFDLTNEQSFLNVRNWISQLQ    | 118 |
| RAB27B     | GSSGKAFKVHLQLWDTAGQERFR-SLTTAFFRDAMGFLLMFDLTSQQSFLNVRNWMSQLQ    | 118 |
|            |                                                                 |     |
| RAB24      | ----GDRTVTLG IWDTAGSERYE-AMSR IYYRGAKAAIVCYDLT DSSSFERAKFWVKELR | 107 |
| RAB6C      | ----EDGTIGRLRLWDTAGQERLR-SLIPRYIRDSAAAVVVYDITNVNSFQQTTKWIDDVR   | 112 |
| RAB6D      | ----EDGTIGRLRLWDTAGQERLR-SLIPRYIRDSAAAVVVYDITNVNSFQQTTKWIDDVR   | 112 |
| RAB6A      | ----EDRTVRLQLWDTAGQERFR-SLIPSYIRDSTVAVVVYDITNVNSFQQTTKWIDDVR    | 112 |
| RAB6B      | ----EDRTVRLQLWDTAGQERFR-SLIPSYIRDSTVAVVVYDITNLNSFQQTTSKWIDDVR   | 112 |
| RAB17      | ----GATSLKLEIWDTAGQEKYH-SVCHLYFRGANAAALLVYDITRKDSFLKAQQWLKDLE   | 117 |
| RAB21      | ----GGKRVNLAIWDTAGQERFH-ALGPIYYRDSNGAILVYDITDEDSFQKVKNWVKELR    | 118 |
| RAB5B      | ----DDTTVKFEIWDTAGQERYH-SLAPMYRGAQAAIVVYDITNQETFARAKTWVKELQ     | 119 |
| RAB5A      | ----DDTTVKFEIWDTAGQERYH-SLAPMYRGAQAAIVVYDITNEESFARAKNWVKELQ     | 119 |
| RAB5C      | ----DDTTVKFEIWDTAGQERYH-SLAPMYRGAQAAIVVYDITNTDTFARAKNWVKELQ     | 120 |
| RAB22A     | ----QNELHKFLIWDTAGQERFR-ALAPMYRGSAAAIIVYDITKEETFSTLKNWVKELR     | 104 |
| RAB22B(31) | ----GNELHKFLIWDTAGQERFH-SLAPMYRGSAAAVIVYDITKQDSFYTLKKWVKELK     | 104 |
| RAB20      | -----YNISIWDTAGREQFH-GLGSMYCRGAAAIILTVDNHRQSLVELEDRFLGLT        | 99  |
| RAB28      | ---PGNLNVTLQIWDIGGQTIGG-KMLDKYIYGAQGVLLVYDITNYQSFENLEDWYTVVK    | 112 |
| RAB29      | ---SDYEIVRLQLWDIAGQERFT-SMTRLYYRDASACVIMFDVTNATTFSNSQRWKQDLD    | 107 |
| RAB32      | ---DSRTLVRQLWDIAGQERFG-NMTRVYYKEAVGAFVVDISRSTFEAVLKWKSDLD       | 125 |
| RAB38      | ---DPETVVRQLWDIAGQERFG-NMTRVYYREAMGAFIVFDVTRPATFEAVAKWKNLD      | 109 |
| RAB34      | ----LGIPFSLQLWDTAGQERFK-CIASTYYRGAQAIIVFNLDVASLEHTKQWLADAL      | 151 |
| RAB36      | ----AGIPVSLQIWDTAGQEKFK-CIASAYYRGAQVIITAFDLTDVQTLLEHTRQWLEDAL   | 222 |
| RAB42      | ---RAGPRVKLQLWDTAGHERFR-CITRSFYRNVVGVLLVFDVTNRKSFEHIQDWHQEV     | 114 |
| RAB39A     | ---EPGKRIKLQLWDTAGQERFR-SITRSYYRNSVGGFLVFDITNRRSFEHVKDWEAK      | 112 |
| RAB39B     | ---EPGKRIKLQLWDTAGQERFR-SITRAYRNSVGGLLFDITNRRSFQNVHEWLEETK      | 108 |
| RAB7B      | ----GD TTLKLQIWD TGQERFR-SMVSTFYKSGDGCILAFDVTDL ESFEALDIWRGDVL  | 107 |
| RAB7A      | ----DDR LVTMQIWD TAGQERFQ-SLGVAFYRGADCCVLVFDVTAPNTFKTLD SWRDEFL | 107 |
| RAB9A      | ----DGHFVTMQIWD TAGQERFR-SLRTPFYRGSDCCLLTF SVDDSQSFQNL SNWKKEFI | 106 |
| RAB9B      | ----DGRFVTLQIWD TAGQERFK-SLRTPFYRGADCCLLTF SVDDRQSFENLGNWKKEFI  | 106 |
| RAB23      | ----NDEDVRLMLWDTAGQEEFD-AITKAYYRGAQACVLVFSTTDRESFEAVSSWREKVV    | 108 |
| RAB40C     | ----DGRRVKLELWDTSGQGRFC-TIFRSYSRGAQGILLVYDITNRWSFDGIDRWIKEID    | 113 |
| RAB40B     | ----DGRRVKLELWDTSGQGRFC-TIFRSYSRGAQGVILVYDIANRWSFDGIDRWIKEID    | 113 |
| RAB40A     | ----DGQRVKLELWDTSGQGRFC-TIFRSYSRGAQGVILVYDIANRWSFEGMDRWIKKIE    | 113 |
| RAB40AL    | ----DGQRVKLELWDTSGQGRFC-TIFRSYSRGAQGVILVYDIANRWSFEGMDRWIKKIE    | 113 |
| RAB33A     | ----EGEKIKVQVWD TAGQERFRKSMVEHYRNHVAVVFVYDVTKMTSFTNLKMWIQECN    | 136 |
| RAB33B     | ----DGERIKIQLWDTAGQERFRKSMVQHYRNHVAVVFYDMTNMASFHSPLPSWIEECK     | 133 |
| RAB30      | ----NGEKVKLQIWD TAGQERFR-SITQSYYSANALILTYDITCEESFRCLPEWLREIE    | 108 |
| RAB19      | ----DGKKVKMQVWD TAGQERFR-TITQSYYSAHAAIIAYDLTRRSTFESIPHWIHEIE    | 116 |
| RAB43      | ----QGKRVKLQIWD TAGQERFR-TITQSYYSANGAILAYDITKRSSFLSVPHWIEDVR    | 117 |
| RAB18      | ----DGNKAKLAIWD TAGQERFR-TLTPSYRGAQGVILVYDVTRRDTFVKLDNWLNELE    | 107 |
| RAB2A      | ----DGKQIKLQIWD TAGQESFR-SITRSYYRGAAGALLVYDITRRDTFNHLT TWLEDAR  | 105 |
| RAB2B      | ----DGKQIKLQIWD TAGQESFR-SITRSYYRGAAGALLVYDITRRET FNHLT SWLEDAR | 105 |
| RAB14      | ----SGQKIKLQIWD TAGQERFR-AVTRSYRGAAGALMVYDITRRSTYNHLSSWLT DAR   | 110 |
| RAB4A      | ----GGKYVKLQIWD TAGQERFR-SVTRSYRGAAGALLVYDITSRETYNALT NWLT DAR  | 112 |
| RAB4B      | ----GGKTVKLQIWD TAGQERFR-SVTRSYRGAAGALLVYDITSRETYNSLAAWLT DAR   | 107 |
| RAB25      | ----GTA AVKAQIWD TAGLERYR-AITSAYYRGAVGALLVFDLT KHQTYAVVERWLKELY | 111 |
| RAB11A     | ----DGKTIKAQIWD TAGQERYR-AITSAYYRGAVGALLVYDIAKHLTYENVERWLKELR   | 110 |
| RAB11B     | ----DGKTIKAQIWD TAGQERYR-AITSAYYRGAVGALLVYDIAKHLTYENVERWLKELR   | 110 |
| RAB12      | ----RGKKIRLQIWD TAGQERFN-SITSAYYRSAGIILVYDITKKETFDDL PKWMMKID   | 141 |
| RAB26      | ----DGVKVKLQIWD TAGQERFR-SVTHAYYRDAHALLLYDVTNKASF DNIQAWL TEIH  | 163 |
| RAB37      | ----DGVRVKLQIWD TAGQERFR-SVTHAYYRDAQALLLYDITNKSSF DNIRAWL TEIH  | 129 |
| RAB3D      | ----HDKRIKLQIWD TAGQERYR-TITTAYYRGAMGFLMYDIANQESFAAVQDWATQIK    | 121 |
| RAB3B      | ----HEKRVKLQIWD TAGQERYR-TITTAYYRGAMGFLMYDITNEESFNAVQDWATQIK    | 121 |
| RAB3A      | ----NDKRIKLQIWD TAGQERYR-TITTAYYRGAMGFLMYDITNEESFNAVQDWSTQIK    | 121 |
| RAB3C      | ----NEKRIKLQIWD TAGQERYR-TITTAYYRGAMGFLMYDITNEESFNAVQDWSTQIK    | 129 |
| RAB15      | ----DGIKVRIQIWD TAGQERYQ-TITKQYYRRAQGIFLVYDISSERSYQHIMKWVSDVD   | 107 |
| RAB13      | ----EGKKIKLQVWD TAGQERFK-TITTAYYRGAMGIILVYDITDEKSFENIQNMKSIK    | 107 |
| RAB10      | ----QGKKIKLQIWD TAGQERFH-TITTSYYRGAMGIMLVYDITNGKSFENISKWLRNID   | 108 |
| RAB8A      | ----DGKRIKLQIWD TAGQERFR-TITTAYYRGAMGIMLVYDITNEKSF DNIKNWIRNIE  | 107 |
| RAB8B      | ----DGKKIKLQIWD TAGQERFR-TITTAYYRGAMGIMLVYDITNEKSF DNIKNWIRNIE  | 107 |
| RAB35      | ----NGEKVKLQIWD TAGQERFR-TITSTYYRGTHGVIVVYDV TSAESFNVVKRWLHEIN  | 107 |
| RAB1A      | ----DGKTIKLQIWD TAGQERFR-TITSSYYRGAHGIIVVYDVT DQESFNVKQWLQEID   | 110 |
| RAB1B      | ----DGKTIKLQIWD TAGQERFR-TITSSYYRGAHGIIVVYDVT DQESYANVKQWLQEID  | 107 |

|            |                                                            |     |
|------------|------------------------------------------------------------|-----|
| RAB27A     | MHAYC---ENPDIVLCGNKSDLED---QRVV-KEEE-----                  | 147 |
| RAB27B     | ANAYC---ENPDIVLIGNKADLPD---QREV-NERQ-----                  | 147 |
| RAB24      | SLEEG-----CQIYLCGTSKDLLEEDRRRRRV-DFHD-----                 | 138 |
| RAB6C      | TERGS----DVIITLVGNRTDLAD----KRQV-SVEE-----                 | 140 |
| RAB6D      | TEGGS----DVIITLVGNKTDLAD----KRQV-SIEE-----                 | 140 |
| RAB6A      | TERGS----DVIIMLVGNKTDLAD----KRQV-SIEE-----                 | 140 |
| RAB6B      | TERGS----DVIIMLVGNKTDLAD----KRQI-TIEE-----                 | 140 |
| RAB17      | EELHP---GEVLVMLVGNKTDLSQ---EREV-TFQE-----                  | 146 |
| RAB21      | KMLGN---EICLCIVGNKIDLEK---ERHV-SIQE-----                   | 146 |
| RAB5B      | RQASP---SIVIALAGNKADLAN---KRMV-EYEE-----                   | 147 |
| RAB5A      | RQASP---NIVIALSGNKADLAN---KRAV-DFQE-----                   | 147 |
| RAB5C      | RQASP---NIVIALAGNKADLAS---KRAV-EFQE-----                   | 148 |
| RAB22A     | QHGGP---NIVVAIAGNKCDLID---VREV-MERD-----                   | 132 |
| RAB22B(31) | EHGPE---NIVMAIAGNKCDLSD---IREV-PLKD-----                   | 132 |
| RAB20      | DTASK---DCLFAIVGNKVDLTE---EGAL-AGQEKEECSPNMDAGDRVSPRAPKQVQ | 150 |
| RAB28      | KVSEE-SETQPLVALVGNKIDLEH---MRTI-KPEK-----                  | 143 |
| RAB29      | SKLTLPNGEPVPCLLANKCDLSP---WAV--SRDQ-----                   | 138 |
| RAB32      | SKVHLPNGSPIPAVLLANKCDQNK---DSSQ-SPSQ-----                  | 157 |
| RAB38      | SKLSLPNGKPVSVVLLANKCDQKG---DVLMNGLK-----                   | 142 |
| RAB34      | KENDP---SSVLLFLVGSKKDLST---PAQY-ALMEKD-----                | 182 |
| RAB36      | RENEA---GSCFIFLVGTTKDLLS---GAAC-EQAEAD-----                | 253 |
| RAB42      | ATQGP---DKVIFLLVGHKSDLQS---TRCV-SAQE-----                  | 143 |
| RAB39A     | MYVQP---FRIVFLLVGHKCDLAS---QRQV-TREE-----                  | 141 |
| RAB39B     | VHVQP---YQIVFVLVGHKCDLDT---QRQV-TRHE-----                  | 137 |
| RAB7B      | AKIVP-MEQSYPMVLLGNKIDLA---DRKV-PQEV-----                   | 137 |
| RAB7A      | IQASPRDPENFPFVVLGNKIDLE---NRQV-ATKR-----                   | 138 |
| RAB9A      | YYADVKEPESFPFVILGNKIDIS---ERQV-STEE-----                   | 137 |
| RAB9B      | YYADVKDPEHFPFVVLGNKVDKE---DRQV-TTEE-----                   | 137 |
| RAB23      | AEVG-----DIPTVLVQNKIDLLD---DSCI-KNEE-----                  | 135 |
| RAB40C     | EHAP-----GVPRIILVGNRLHLAF---KRQV-PTEQ-----                 | 140 |
| RAB40B     | EHAP-----GVPKILVGNRLHLAF---KRQV-PTEQ-----                  | 140 |
| RAB40A     | EHAP-----GVPKILVGNRLHLAF---KRQV-PREQ-----                  | 140 |
| RAB40AL    | EHAP-----GVPKILVGNRLHLAF---KRQV-PREQ-----                  | 140 |
| RAB33A     | GHAVP---PLVPKVLVGNKCDLRE---QIQV-PSNL-----                  | 165 |
| RAB33B     | QHLLA---NDIPRIILVGNKCDLRS---AIQV-PTDL-----                 | 162 |
| RAB30      | QYASN---KVITVLVGNKIDLAE---RREV-SQQR-----                   | 136 |
| RAB19      | KYGAA---NVVIMLIGNKCDLWE---KRHV-LFED-----                   | 144 |
| RAB43      | KYAGS---NIVQLLIGNKSDLSE---LREV-SLAE-----                   | 145 |
| RAB18      | TYCTR---NDIVNMLVGNKIDKE---NREV-DRNE-----                   | 135 |
| RAB2A      | QHSNS---NMVIMLIGNKSDLES---RREV-KKEE-----                   | 133 |
| RAB2B      | QHSSS---NMVIMLIGNKSDLES---RRDV-KREE-----                   | 133 |
| RAB14      | NLTNP---NTVILIGNKADLEA---QRDV-TYEE-----                    | 138 |
| RAB4A      | MLASQ---NIVILCGNKKDLDA---DREV-TFLE-----                    | 140 |
| RAB4B      | TLASP---NIVILCGNKKDLDP---EREV-TFLE-----                    | 135 |
| RAB25      | DHAEA---TIVVMLVGNKSDLSQ---AREV-PTDE-----                   | 139 |
| RAB11A     | DHADS---NIVIMLVGNKSDLRH---LRAV-PTDE-----                   | 138 |
| RAB11B     | DHADS---NIVIMLVGNKSDLRH---LRAV-PTDE-----                   | 138 |
| RAB12      | KYASE---DAELLLVGNKLDCE---DREI-TRQQ-----                    | 169 |
| RAB26      | EYAQH---DVALMLLGNKVDSAH---ERVV-KRED-----                   | 191 |
| RAB37      | EYAGR---DVVIMLLGNKADMSS---ERVI-RSED-----                   | 157 |
| RAB3D      | TYSWD---NAQVILVGNKCDLED---ERVV-PAED-----                   | 149 |
| RAB3B      | TYSWD---NAQVILVGNKCDMEE---ERVV-PTEK-----                   | 149 |
| RAB3A      | TYSWD---NAQVLLVGNKCDMED---ERVV-SSER-----                   | 149 |
| RAB3C      | TYSWD---NAQVILVGNKCDMED---ERVI-STER-----                   | 157 |
| RAB15      | EYAPE---GVQKILIGNKADEEQ---KRQV-GREQ-----                   | 135 |
| RAB13      | ENASA---GVERLLLGNKCDMEA---KRKV-QKEQ-----                   | 135 |
| RAB10      | EHANE---DVERMLLGNKCDMDD---KRVV-PKGK-----                   | 136 |
| RAB8A      | EHASA---DVEKMILGNKCDVND---KRQV-SKER-----                   | 135 |
| RAB8B      | EHASS---DVERMILGNKCDMND---KRQV-SKER-----                   | 135 |
| RAB35      | QNC-D---DVCRIILVGNKNDDEPE---RKVV-ETED-----                 | 134 |
| RAB1A      | RYASE---NVNKLLVGNKCDLTT---KKVV-DYTT-----                   | 138 |
| RAB1B      | RYASE---NVNKLLVGNKSDLTT---KKVV-DNTT-----                   | 135 |

|            |                                          |                                      |                        |     |
|------------|------------------------------------------|--------------------------------------|------------------------|-----|
| RAB27A     | ---AIALAEK-Y-----                        | GI-PYFETSAAN---                      | GTNISQAIEMLLDLIMKRMER  | 187 |
| RAB27B     | ---ARELADK-Y-----                        | GI-PYFETSAAT---                      | GQNVEKAVETLLDLIMKRMEQ  | 187 |
|            |                                          |                                      |                        |     |
| RAB24      | ---VQDYADN-I-----                        | KA-QLFETSSKT---                      | GQSVDELQKVAEDYVSVAAF   | 178 |
| RAB6C      | ---GERKAKG-L-----                        | NV-TFIETRAKA---                      | GYNVKQLFRRVAAALPGMEST  | 180 |
| RAB6D      | ---GERKAKG-L-----                        | NV-TFIETRAKA---                      | GYNVKQLFRRVAAALPGMEST  | 180 |
| RAB6A      | ---GERKAKE-L-----                        | NV-MFIETSAKA---                      | GYNVKQLFRRVAAALPGMEST  | 180 |
| RAB6B      | ---GEQRAKE-L-----                        | SV-MFIETSAKT---                      | GYNVKQLFRRVASALPGMENV  | 180 |
| RAB17      | ---GKEFADS-Q-----                        | KL-LFMETSAKL---                      | NHQVSEVFNTVAQELLQRSDE  | 186 |
| RAB21      | ---AESYAES-V-----                        | GA-KHYHTSAKQ---                      | NKGIEELFLDLCKRMIETAQV  | 186 |
| RAB5B      | ---AQAYADD-N-----                        | SL-LFMETSAKT---                      | AMNVNDLFLAIKKLPKSEPQ   | 187 |
| RAB5A      | ---AQSYADD-N-----                        | SL-LFMETSAKT---                      | SMNVNEIFMAIAKKLPKNEPQ  | 187 |
| RAB5C      | ---AQAYADD-N-----                        | SL-LFMETSAKT---                      | AMNVNEIFMAIAKKLPKNEPQ  | 188 |
| RAB22A     | ---AKDYADS-I-----                        | HA-IFVETSAKN---                      | AININELFIEISRRIPSTDAN  | 172 |
| RAB22B(31) | ---AKEYAES-I-----                        | GA-IVVETSAKN---                      | AINIEELFQGISRQIPPLDPH  | 172 |
| RAB20      | LEDAAVALYKKILKYKMLDEQDVPAAEQMCFETSAKT--- | GYNVDLLFETLFDLVVPMILQ                | 207                    |     |
| RAB28      | ---HLRFCQE-N-----                        | GF-SSHVFSAKT---                      | GDSVFLCFQKVAEEILGIKLN  | 183 |
| RAB29      | ---IDRFSKE-N-----                        | GFTGWTETSVKE---                      | NKNINEAMRVLIEKMMRNSTE  | 179 |
| RAB32      | ---VDQFCKE-H-----                        | GFAGWFETSAKD---                      | NINIEEAARFLVEKILVNHQS  | 198 |
| RAB38      | ---MDQFCKE-H-----                        | GFVGWFETSAKE---                      | NINIDEASRCLVKHILANEC   | 183 |
| RAB34      | ---ALQVAQE-M-----                        | KA-EYWAVSSLT---                      | GENVREFFFRVAALTFEANVL  | 222 |
| RAB36      | ---AVHLARE-M-----                        | QA-EYWSVSAKT---                      | GENVKAFFSRVAALAFEQSVL  | 293 |
| RAB42      | ---AEELAAS-L-----                        | GM-AFVETSVKN---                      | NCNVDLAFDTLADAIQQALQQ  | 183 |
| RAB39A     | ---AEKLSAD-C-----                        | GM-KYIETSAKD---                      | ATNVEESFTILTRDIYELIKK  | 181 |
| RAB39B     | ---AEKLAAS-Y-----                        | GM-KYIETSARD---                      | AINVEKAFTDLTRDIYELVKR  | 177 |
| RAB7B      | ---AQGWCRE-K-----                        | DIPYFEVSAKN---                       | DINVVQAFEMLASRALSRYQS  | 177 |
| RAB7A      | ---AQAWCYS-K-----                        | NNIPYFETSAKE---                      | AINVEQAFQTIARNALKQETE  | 179 |
| RAB9A      | ---AQAWCRD-N-----                        | GDYPYFETSAKD---                      | ATNVAAAFEEAVRRVLATEDR  | 178 |
| RAB9B      | ---AQTWCME-N-----                        | GDYPYLETSAKD---                      | DTNVTVAFEEAVRQVLAVEEQ  | 178 |
| RAB23      | ---AEALAKR-L-----                        | KL-RFYRTSVKE---                      | DLNVNEVFKYLAEKYLQKLKQ  | 175 |
| RAB40C     | ---ARAYAER-L-----                        | CM-TFFEVSPLC---                      | NFNVTVAFEEAVRQVLAVEEQ  | 180 |
| RAB40B     | ---AQAYAER-L-----                        | GV-TFFEVSPLC---                      | NFNVTVAFEEAVRQVLAVEEQ  | 180 |
| RAB40A     | ---AQAYAER-L-----                        | GV-TFFEVSPLC---                      | NFNVTVAFEEAVRQVLAVEEQ  | 180 |
| RAB40AL    | ---AQAYAER-L-----                        | GV-TFFEVSPLC---                      | NFNVTVAFEEAVRQVLAVEEQ  | 180 |
| RAB33A     | ---ALKFADA-H-----                        | NM-LLFETSAKDPKESQNVESIFMCLACRLKAQKSL | 208                    |     |
| RAB33B     | ---AQKFADT-H-----                        | SM-PLFETSAKNPNDNDHVEAIFMTLAHKLKSHKPL | 205                    |     |
| RAB30      | ---AEFSEA-Q-----                         | DM-YYLETSAKE---                      | SDNVEKLFLDLACRLISEARQ  | 176 |
| RAB19      | ---ACTLAKE-Y-----                        | GLLAVLETSAKE---                      | SKNIEEVFVLMAKELIARNSL  | 185 |
| RAB43      | ---AQSLAEH-Y-----                        | DILCAIETSAKD---                      | SSNVEEAFLRVATELIMRHGG  | 186 |
| RAB18      | ---GLKFARK-H-----                        | SM-LFIEASAKT---                      | CDGVQCAFEELVEKIIQTPGL  | 175 |
| RAB2A      | ---GEAFARE-H-----                        | GL-IFMETSAKT---                      | ASNVEEAFINTAKEIYEKIQE  | 173 |
| RAB2B      | ---GEAFARE-H-----                        | GL-IFMETSAKT---                      | ACNVEEAFINTAKEIYRKIQE  | 173 |
| RAB14      | ---AKQFAEE-N-----                        | GL-LFLEASAKT---                      | GENVEDAFLEAAKKIYQNIQD  | 178 |
| RAB4A      | ---ASRFAQE-N-----                        | EL-MFLETSAKT---                      | GENVEEAFVQCARKILNKIES  | 180 |
| RAB4B      | ---ASRFAQE-N-----                        | EL-MFLETSAKT---                      | GENVEEAFVQCARKILNKIES  | 175 |
| RAB25      | ---ARMFAEN-N-----                        | GL-LFLETSAKD---                      | STNVELAFETVLKEIFAKVSK  | 179 |
| RAB11A     | ---ARAFAEK-N-----                        | GL-SFIETSALD---                      | STNVEEAFQITLTIYRIVSQ   | 178 |
| RAB11B     | ---ARAFAEK-N-----                        | NL-SFIETSALD---                      | STNVEEAFKNILTEIYRIVSQ  | 178 |
| RAB12      | ---GEKFQQIT-----                         | GM-RFCEASAKD---                      | NFNVDLAFETVLKEIFAKVSK  | 210 |
| RAB26      | ---GEKLAKY-Y-----                        | GL-PFMETSAKT---                      | GLNVDLAFTAIKELKQSRMK   | 231 |
| RAB37      | ---GETLARE-Y-----                        | GV-PFLETSAKT---                      | GMNVELAFLAIAKELKYRAGH  | 197 |
| RAB3D      | ---GRRLLAD-L-----                        | GF-EFFEASAKE---                      | NINVKQVFERLVDVICEKMNE  | 189 |
| RAB3B      | ---GQLLAQ-L-----                         | GF-DFFEASAKE---                      | NISVRQAFERLVDICDKMSD   | 189 |
| RAB3A      | ---GRQLADH-L-----                        | GF-EFFEASAKD---                      | NINVKQVFERLVDVICEKMSE  | 189 |
| RAB3C      | ---GQHLGEQ-L-----                        | GF-EFFETSAKD---                      | NINVKQVFERLVDIICDKMSE  | 197 |
| RAB15      | ---GQQLAKE-Y-----                        | GM-DFYETSACT---                      | NLNIKESFTRLTELVLQAHRK  | 175 |
| RAB13      | ---ADKLARE-H-----                        | GI-RFFETSAKS---                      | SMNVDEAFSSSLARDILLKSGG | 175 |
| RAB10      | ---GEQIARE-H-----                        | GI-RFFETSAKA---                      | NINIEKAFTLAEDILRKTPV   | 176 |
| RAB8A      | ---GEKLALD-Y-----                        | GI-KFMETSAKA---                      | NINVENAFTLARDIAKAKMDK  | 175 |
| RAB8B      | ---GEKLALD-Y-----                        | GI-KFLETSAKS---                      | SANVEEAFFTLARDIMTKLNR  | 175 |
| RAB35      | ---AYKFAGQ-M-----                        | GI-QLFETSAKE---                      | NVNVEEMFNCITELVLRRAKD  | 174 |
| RAB1A      | ---AKEFADS-L-----                        | GI-PFLETSAKN---                      | ATNVEQSFMTMAAEIKKRMGP  | 178 |
| RAB1B      | ---AKEFADS-L-----                        | GI-PFLETSAKN---                      | ATNVEQAFMTMAAEIKKRMGP  | 175 |

|            |   |                                                              |     |
|------------|---|--------------------------------------------------------------|-----|
| RAB27A     | C | VDKSWIPEGV-VRSNGHA-----S-TD-----QLSEEKEKGA                   | 218 |
| RAB27B     | C | VEKTQIPDTV-NGGNSGN-----LDGEKPPPEKK                           | 215 |
|            |   |                                                              |     |
| RAB24      |   | QVMTE-----DKGV---DLS-----QK-ANPYFYS                          | 199 |
| RAB6C      |   | QDGSRE-----DMSDIKLE-----KPQEQTVSEG                           | 204 |
| RAB6D      |   | QDGSRE-----DMSDIKLE-----KPQEQTVSEG                           | 204 |
| RAB6A      |   | QDRSRE-----DMIDIKLE-----KPQEQPVSEG                           | 204 |
| RAB6B      |   | QEKSKE-----GMIDIKLD-----KPQEPPASEG                           | 204 |
| RAB17      |   | EGQA-----LRGDAVALN-----K-GPARQAK                             | 208 |
| RAB21      |   | DERAKGNGSSQ-----PGTARRGVQIIDDE-----PQ-AQTSGGG                | 220 |
| RAB5B      |   | NLG---G---A-----A-GRSRGV---DLH-----EQ-SQQNKSQ                | 211 |
| RAB5A      |   | NPG---A---N-----S-ARGRGV---DLT-----EP-TQPTRNQ                | 211 |
| RAB5C      |   | NAT---G---A-----P-GRNRGV---DLQ-----EN-NPASRSQ                | 212 |
| RAB22A     |   | LPS---G-----GKGF---KLR-----RQ-PSEPKRS                        | 192 |
| RAB22B(31) |   | ENG---N-----NGTI---KVE-----KP-TMQASRR                        | 192 |
| RAB20      |   | QRAERPSHTVD-----ISS-----HKPPKRTMSG                           | 231 |
| RAB28      |   | KAEIEQ-SQRVVKA-----D-IVNYNQEPMS---RTVNPPRS                   | 215 |
| RAB29      |   | DIMSLSTQG-----D-YINLQTK-----S---SSWS                         | 201 |
| RAB32      |   | FPNE-ENDV-----D-KIKLDQE-----TLRAENKSQ                        | 223 |
| RAB38      |   | LMESIEPDV-----V-KPHLT-----STKVASCSSG                         | 207 |
| RAB34      |   | AELEKSGARRI-----GD-VVRINSDDSN-LYLTASKKKP                     | 255 |
| RAB36      |   | QDLERQSSARL-----QV-----GNGD-LIQMEGSPPE-TQESKRPSL             | 330 |
| RAB42      |   | GDIKLEEGWGGVRLI-----H-KTQIPRS---P-SRKQHSQP                   | 215 |
| RAB39A     |   | GEICIQDQWEGVKSG-----F-VPNTVHS---SEEAVKPRKE                   | 214 |
| RAB39B     |   | GEITIQEGWEGVKSG-----F-VPNVVHS---SEEVVKSERR                   | 210 |
| RAB7B      |   | ILE-N---HLTE-----SIKL-----S-P-DQSRSR                         | 197 |
| RAB7A      |   | VELYNEFPEPI-----KLDK-----NDR-AKASAE                          | 203 |
| RAB9A      |   | SDHLI---QTD-----TVNL-----HRK-PKPSSS                          | 199 |
| RAB9B      |   | LEHCM---LGH-----TIDL-----NSG-SKAGSS                          | 199 |
| RAB23      |   | QIAEDPELTHSSSNKIGVFNTSGGSHSGQNSGTLNGGD-VINLRPN-KQRTKKNRNPFSS | 233 |
| RAB40C     |   | EKIWRPNRV-----FSLQDL                                         | 195 |
| RAB40B     |   | DRLWRPSKV-----LSLQDL                                         | 195 |
| RAB40A     |   | NWLGRPSKV-----LSLQDL                                         | 195 |
| RAB40AL    |   | NWLGRPSKV-----LSLQDL                                         | 195 |
| RAB33A     |   | LYRDAERQQGK---V-----Q-KLEF-----PQEANSKTS                     | 234 |
| RAB33B     |   | MLSQPPDN-G-----IIL-----KPEPKPAMT                             | 226 |
| RAB30      |   | NTLVNNV-----SSPL-----PGEKGSISYL                              | 197 |
| RAB19      |   | HLYGESALN-G---LPLD-----S-SPVL-----MAQGPSEKTH                 | 214 |
| RAB43      |   | PLFSEKSPD-H---IQLN-----S-KDI-----GEGWG                       | 209 |
| RAB18      |   | WESENQNK---G---VKLS-----H-REE-----GQG-GGACGG                 | 201 |
| RAB2A      |   | GVFDINNEANGIKIGPQHA-----A-TNATHAG---NQGGQQAGGG               | 210 |
| RAB2B      |   | GLFDVHNEANGIKIGPQQS-----I-STSVGPSASQRNSRDIGSNSG              | 214 |
| RAB14      |   | GSLDLNAAESGVQHKPSAP-----Q-GGRL-TS---EPQPQREGCG               | 214 |
| RAB4A      |   | GELDPERMGSGIQYGDAAL-----R-QLRSPRR---AQAPNAQECG               | 217 |
| RAB4B      |   | GELDPERMGSGIQYGDASL-----R-QLRQPRS---AQAVAPQPCG               | 212 |
| RAB25      |   | QRQNSIRTNAITLGSQA-----AG---QEPGPGEKRA                        | 208 |
| RAB11A     |   | KQMSDRRENDMSPSNNVV-----PIHVPPT---TEN---KPKVQ                 | 211 |
| RAB11B     |   | KQIADRAAHDESPGNNVV-----DISVPPT---TDGQKPNKLQ                  | 213 |
| RAB12      |   | DILRNELS---NSI---LSLQ-----P-EPEIPPE---LPP-PRPHVR             | 242 |
| RAB26      |   | APSEPRFR-----LH-----D-YV-----KR-EGRGAS                       | 252 |
| RAB37      |   | QADEPSFQ-----IR-----D-YV-----ES-QKKRSS                       | 218 |
| RAB3D      |   | SLEPSSSS-GSNGKGPVAVG-----D-AP-----APQPS                      | 216 |
| RAB3B      |   | SLDT-DPSMLGSSKNTRLS-----D-TP-----PLLQQN                      | 216 |
| RAB3A      |   | SLDTADPAVTGAKQGPQLS-----D-QQ-----VPPHQD                      | 217 |
| RAB3C      |   | SLET-DPAITAANKQNTLRLK-----E-TP-----PPPQPN                    | 224 |
| RAB15      |   | ELEGLMRASNELALAELE-----E-EEG-KPE---GP---ANSSKT               | 209 |
| RAB13      |   | RRSGNGNKPPSTD---LK-----TCD-KKNTNK                            | 199 |
| RAB10      |   | KEPNSENVDISSGGGVT-----GW---KS-----K                          | 198 |
| RAB8A      |   | KLEGNSPQ---GSNQGVKIT-----PD---QK-RSSFRR                      | 203 |
| RAB8B      |   | KMNDNSNA---GAGGPVKIT-----EN---RSK-KTSFFR                     | 203 |
| RAB35      |   | NLAKQQQQ---QQNDVVKLT-----KN-----SKRKKR                       | 199 |
| RAB1A      |   | GATAGGAE---KSNVKIQST-----PV-----KQSGGG                       | 203 |
| RAB1B      |   | GAASGG-E---RPNLKIDST-----PV-----KPAGGG                       | 199 |

|            |                                                              |     |
|------------|--------------------------------------------------------------|-----|
| RAB27A     | CGC-----                                                     | 221 |
| RAB27B     | CIC-----                                                     | 218 |
| RAB24      | CCHH-----                                                    | 203 |
| RAB6C      | GCSCYSPMSSSTLPQKPPYSFIDCSVNI GLNLFPSLITFCNSSLLPVSWR-----     | 254 |
| RAB6D      | GCSCYSPMSSSTLPQKPPYSFIDCSVNI GLNLFPSLITFCNSSLLPVSWR-----     | 254 |
| RAB6A      | GCSC-----                                                    | 208 |
| RAB6B      | GCSC-----                                                    | 208 |
| RAB17      | CCAH-----                                                    | 212 |
| RAB21      | CCSSG-----                                                   | 225 |
| RAB5B      | CCSN-----                                                    | 215 |
| RAB5A      | CCSN-----                                                    | 215 |
| RAB5C      | CCSN-----                                                    | 216 |
| RAB22A     | CC-----                                                      | 194 |
| RAB22B(31) | CC-----                                                      | 194 |
| RAB20      | CCA-----                                                     | 234 |
| RAB28      | SMCAVQ-----                                                  | 221 |
| RAB29      | CC-----                                                      | 203 |
| RAB32      | CC-----                                                      | 225 |
| RAB38      | CAKS-----                                                    | 211 |
| RAB34      | TCCP-----                                                    | 259 |
| RAB36      | GCC-----                                                     | 333 |
| RAB42      | CQC-----                                                     | 218 |
| RAB39A     | CFC-----                                                     | 217 |
| RAB39B     | CLC-----                                                     | 213 |
| RAB7B      | CC-----                                                      | 199 |
| RAB7A      | SCSC-----                                                    | 207 |
| RAB9A      | CC-----                                                      | 201 |
| RAB9B      | CC-----                                                      | 201 |
| RAB23      | CSIP-----                                                    | 237 |
| RAB40C     | CCRAIVSCTPVHLIDKLPLPVTIKS---HLKSFSMANGMNAVMMHGRSYSLASGAGGGGS | 252 |
| RAB40B     | CCRAVVSCTPVHLVDKLPLPIALRS---HLKSFSMANGLNARMMHGGSYSLTTSST---H | 249 |
| RAB40A     | CCRTIVSCTPVHLVDKLPLPSTLRS---HLKSFSMAKGLNARMMRGLSYSLTTSST---H | 249 |
| RAB40AL    | CCRTIVSCTPVHLVDKLPLPIALRS---HLKSFSMAKGLNARMMRGLSYSLTTSST---H | 249 |
| RAB33A     | CPC-----                                                     | 237 |
| RAB33B     | CWC-----                                                     | 229 |
| RAB30      | TCCNFN-----                                                  | 203 |
| RAB19      | CTC-----                                                     | 217 |
| RAB43      | CGC-----                                                     | 212 |
| RAB18      | YCSVL-----                                                   | 206 |
| RAB2A      | CC-----                                                      | 212 |
| RAB2B      | CC-----                                                      | 216 |
| RAB14      | C-----                                                       | 215 |
| RAB4A      | C-----                                                       | 218 |
| RAB4B      | C-----                                                       | 213 |
| RAB25      | CCISL-----                                                   | 213 |
| RAB11A     | CCQNI-----                                                   | 216 |
| RAB11B     | CCQNL-----                                                   | 218 |
| RAB12      | CC-----                                                      | 244 |
| RAB26      | CCRP-----                                                    | 256 |
| RAB37      | CCSFM-----                                                   | 223 |
| RAB3D      | CSC-----                                                     | 219 |
| RAB3B      | CSC-----                                                     | 219 |
| RAB3A      | CAC-----                                                     | 220 |
| RAB3C      | CAC-----                                                     | 227 |
| RAB15      | CWC-----                                                     | 212 |
| RAB13      | CSLG-----                                                    | 203 |
| RAB10      | CC-----                                                      | 200 |
| RAB8A      | CVLL-----                                                    | 207 |
| RAB8B      | CSLL-----                                                    | 207 |
| RAB35      | CC-----                                                      | 201 |
| RAB1A      | CC-----                                                      | 205 |
| RAB1B      | CC-----                                                      | 201 |

|            |                               |     |
|------------|-------------------------------|-----|
| RAB27A     | -----                         | 221 |
| RAB27B     | -----                         | 218 |
|            |                               |     |
| RAB24      | -----                         | 203 |
| RAB6C      | -----                         | 254 |
| RAB6D      | -----                         | 254 |
| RAB6A      | -----                         | 208 |
| RAB6B      | -----                         | 208 |
| RAB17      | -----                         | 212 |
| RAB21      | -----                         | 225 |
| RAB5B      | -----                         | 215 |
| RAB5A      | -----                         | 215 |
| RAB5C      | -----                         | 216 |
| RAB22A     | -----                         | 194 |
| RAB22B(31) | -----                         | 194 |
| RAB20      | -----                         | 234 |
| RAB28      | -----                         | 221 |
| RAB29      | -----                         | 203 |
| RAB32      | -----                         | 225 |
| RAB38      | -----                         | 211 |
| RAB34      | -----                         | 259 |
| RAB36      | -----                         | 333 |
| RAB42      | -----                         | 218 |
| RAB39A     | -----                         | 217 |
| RAB39B     | -----                         | 213 |
| RAB7B      | -----                         | 199 |
| RAB7A      | -----                         | 207 |
| RAB9A      | -----                         | 201 |
| RAB9B      | -----                         | 201 |
| RAB23      | -----                         | 237 |
| RAB40C     | KGNSLKRSKSIRPPQSPPQNCRSNCKIS  | 281 |
| RAB40B     | KRSSLRKVKLVPPQSPPKNCTRNSCKIS  | 278 |
| RAB40A     | K-SSLCKVEIVCPPQSPPKNCTRNSCKIS | 277 |
| RAB40AL    | KRSSLCKVKIVCPPQSPPKNCTRNSCKIS | 278 |
| RAB33A     | -----                         | 237 |
| RAB33B     | -----                         | 229 |
| RAB30      | -----                         | 203 |
| RAB19      | -----                         | 217 |
| RAB43      | -----                         | 212 |
| RAB18      | -----                         | 206 |
| RAB2A      | -----                         | 212 |
| RAB2B      | -----                         | 216 |
| RAB14      | -----                         | 215 |
| RAB4A      | -----                         | 218 |
| RAB4B      | -----                         | 213 |
| RAB25      | -----                         | 213 |
| RAB11A     | -----                         | 216 |
| RAB11B     | -----                         | 218 |
| RAB12      | -----                         | 244 |
| RAB26      | -----                         | 256 |
| RAB37      | -----                         | 223 |
| RAB3D      | -----                         | 219 |
| RAB3B      | -----                         | 219 |
| RAB3A      | -----                         | 220 |
| RAB3C      | -----                         | 227 |
| RAB15      | -----                         | 212 |
| RAB13      | -----                         | 203 |
| RAB10      | -----                         | 200 |
| RAB8A      | -----                         | 207 |
| RAB8B      | -----                         | 207 |
| RAB35      | -----                         | 201 |
| RAB1A      | -----                         | 205 |
| RAB1B      | -----                         | 201 |

**Figure S4.** Full Sequence alignment of Rab proteins in phylogenetic order compared to Rab27A and B (top). Unique cysteines C123 and C188 are highlighted in red.

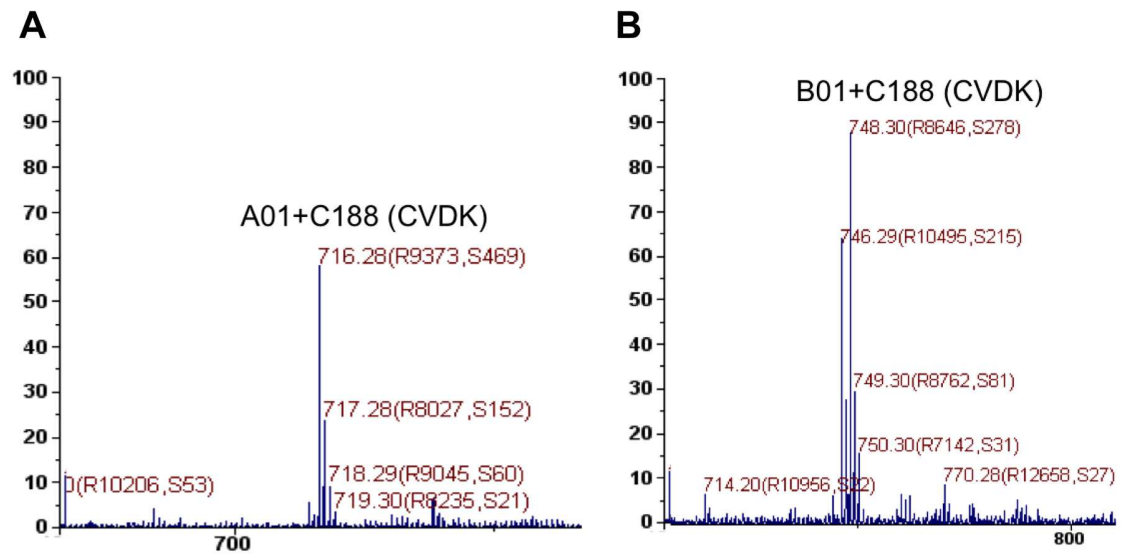

**Figure S5.** Tryptic digestion and peptide mass fingerprinting for labelling site-ID of A) **A01**-fRab27A-C188 and B) **B01**-fRab27A-C188.

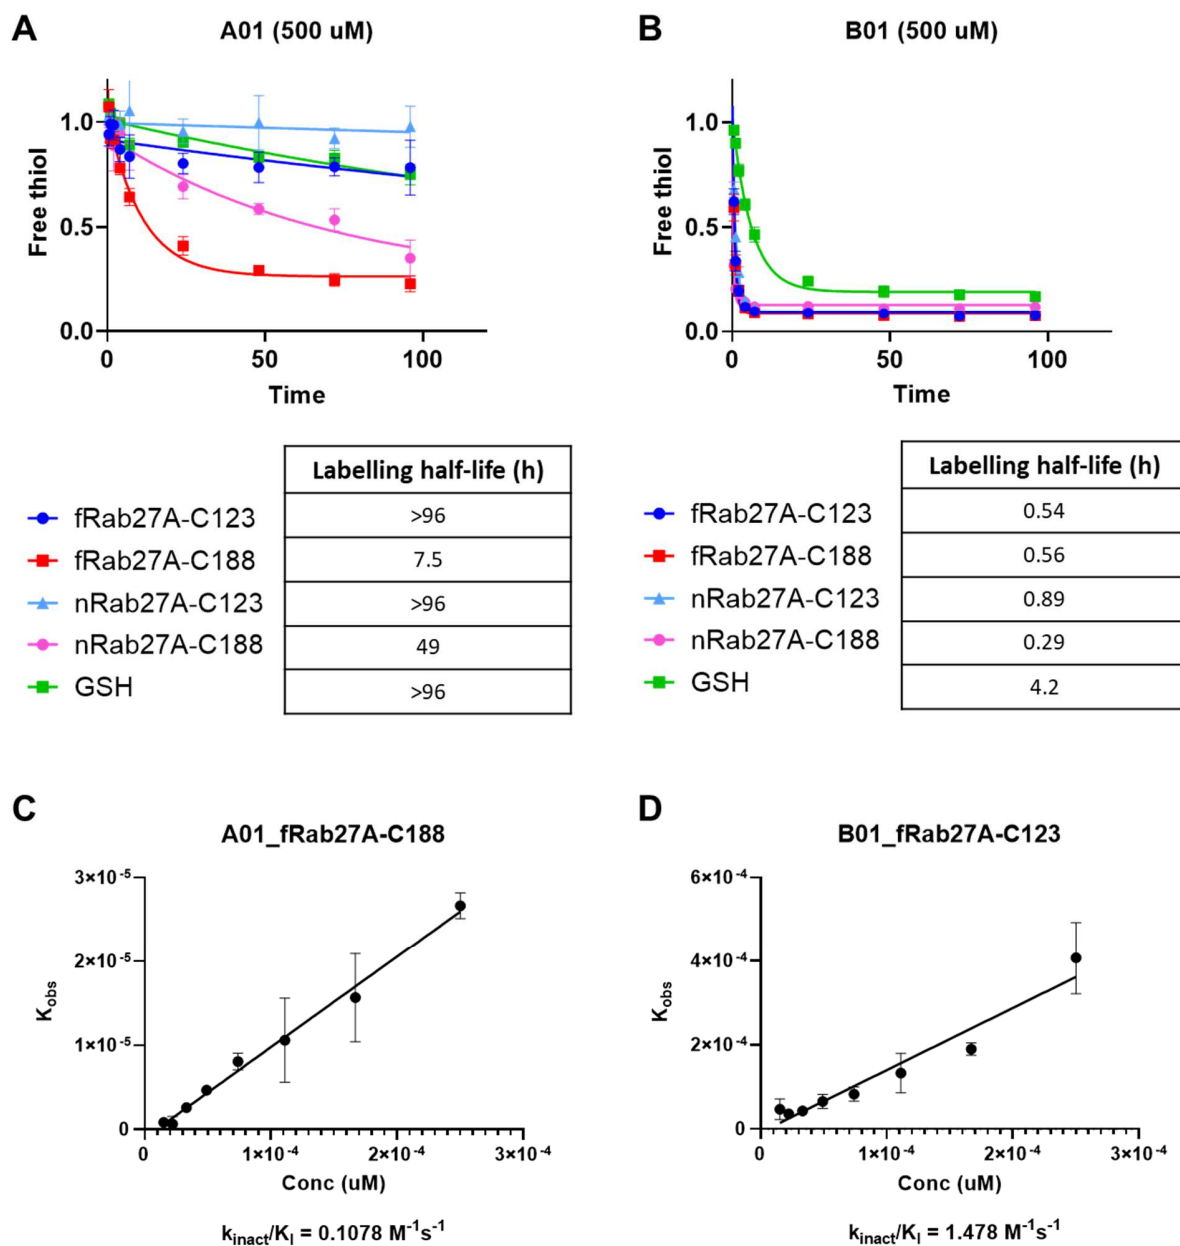

**Figure S6.** Biochemical characterisation of hits. A–B) qIT data against fRab27A-C123, fRab27A-C188, nRab27A-C123, nRab27A-C188 and GSH including labelling half-lives for resynthesised hits **A01** (A) and **B01** (B). C–D)  $k_{obs}/[I]$  graphs for **A01** against fRab27A-C188 (C), and for **B01** against fRab27A-C123 (D)



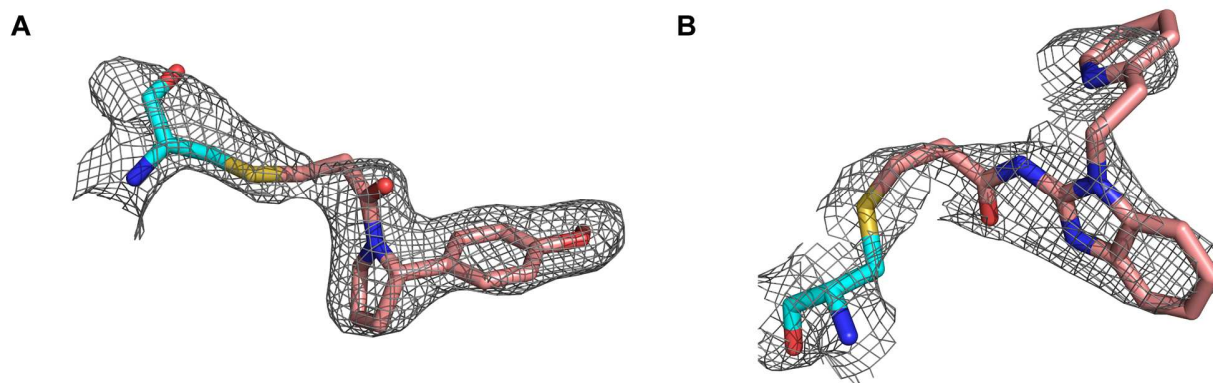

**Figure S7.** Electron density maps for **A01** and **B01**.  $2F_o - F_c$  electron density maps (grey) contoured at  $1.0 \sigma$  for ligands (pink) covalently bound to a cysteine residue (cyan). A) **A01** bound to fRab27A-C188 (full structure shown in **Fig. 3B** and **3C**) and B) **B01** bound to fRab27A-C123 (full structure shown in **Fig. 3E** and **3F**) superimposed on the final model of the respective ligands.

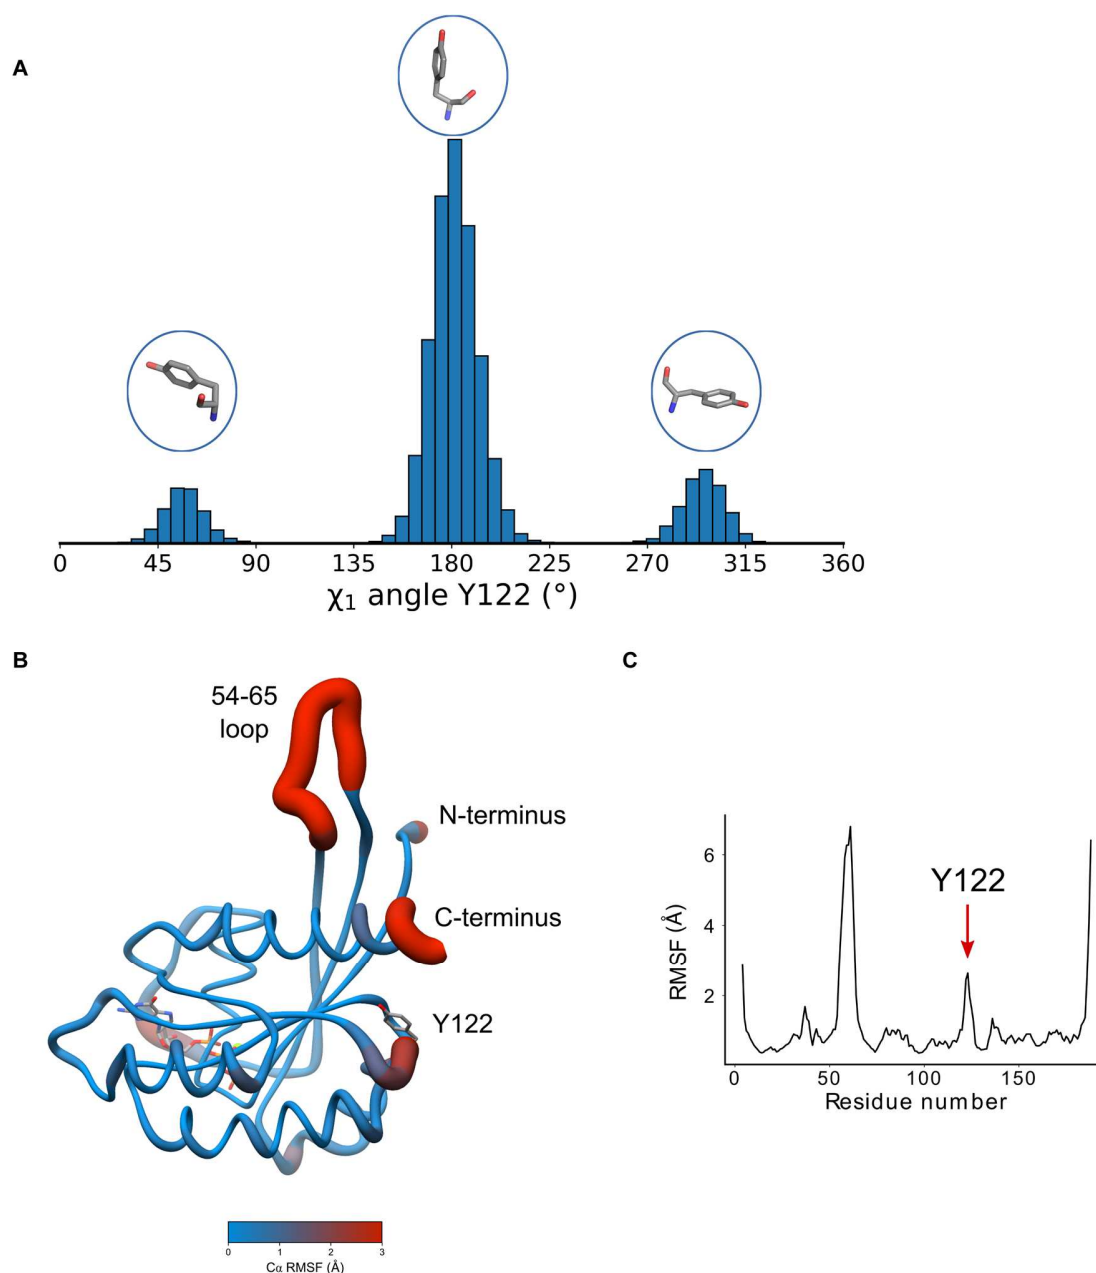

**Figure S8.** Molecular dynamics and rotameric properties of Y122 in Rab27A. (A) Distribution of chi-1 angles of Y122 during a 250 ns molecular dynamics simulation. (B) Structure of Rab27A, coloured according to the C-alpha Root Mean Squared Fluctuations. Red colours (thicker ribbon) correspond to more mobile regions, whereas blue regions are more rigid. (C) C-alpha Root Mean Squared Fluctuations of Rab27A plotted against its primary sequence.

## Supplementary Tables

**Table S1.** Data Processing and Refinement Statistics for fRab27A

|                                                            |                                                         |
|------------------------------------------------------------|---------------------------------------------------------|
| Data Collection                                            |                                                         |
| Space group                                                | <i>P</i> 3 <sub>1</sub> 21                              |
| Unit cell parameters (Å)                                   | <i>a</i> = 117.71, <i>b</i> = 117.71, <i>c</i> = 115.67 |
| Wavelength (Å)                                             | 0.97949                                                 |
| Resolution (Å)                                             | 50.97 - 2.32 (2.40 - 2.32)                              |
| Total reflections                                          | 80969 (7952)                                            |
| Unique reflections                                         | 40486 (3976)                                            |
| Multiplicity                                               | 2.0 (2.0)                                               |
| Completeness (%)                                           | 99.96 (99.95)                                           |
| $\langle I \rangle / \langle \sigma(I) \rangle$            | 20.04 (3.29)                                            |
| $R_{\text{merge}}$                                         | 0.027 (0.240)                                           |
| $R_{\text{meas}}$                                          | 0.039 (0.340)                                           |
| Wilson <i>B</i> factor                                     | 36.64                                                   |
| CC <sub>1/2</sub>                                          | 0.999 (0.844)                                           |
| Refinement                                                 |                                                         |
| Reflections used in refinement                             | 40483 (3976)                                            |
| Reflections used for $R_{\text{free}}$                     | 1945 (229)                                              |
| $R_{\text{work}}$ (%)                                      | 0.159                                                   |
| $R_{\text{free}}$ (%)                                      | 0.198                                                   |
| Rmsd bond lengths (Å)                                      | 0.008                                                   |
| Rmsd bond angles (°)                                       | 1.10                                                    |
| Average <i>B</i> factors (Å <sup>2</sup> )/Number of atoms |                                                         |
| Macromolecules                                             | 42.13/ 3426                                             |
| Water molecules                                            | 47.12/398                                               |
| Ligand non-H atoms gppnhp-Mg <sup>2+</sup>                 | 28.3/66                                                 |
| Φ/Ψ angles (%)                                             |                                                         |
| Ramachandran Most favored region (%)                       | 97.79                                                   |
| Ramachandran allowed region (%)                            | 2.1                                                     |
| Ramachandran outliers (%)                                  | 0.0                                                     |
| Rotamer outliers (%)                                       | 0.56                                                    |

Statistics for the highest-resolution shell are shown in parentheses.

$$R_{\text{merge}} = \sum (|I_h| - \langle I_h \rangle) / \sum \langle I_h \rangle$$

$$R_{\text{meas}} = \sum \sqrt{(n_h/n_h - 1)} (|I_h| - \langle I_h \rangle) / \sum \langle I_h \rangle$$

**Table S2.** Data Processing and Refinement Statistics for fRab27A-C188 covalently bound to **A01**

|                                                            |                                                       |
|------------------------------------------------------------|-------------------------------------------------------|
| Data Collection                                            |                                                       |
| Space group                                                | <i>P</i> 2 <sub>1</sub> 2 <sub>1</sub> 2 <sub>1</sub> |
| Unit cell parameters (Å)                                   | <i>a</i> = 61.71, <i>b</i> = 76.82, <i>c</i> = 117.82 |
| Wavelength (Å)                                             | 0.97949                                               |
| Resolution (Å)                                             | 36.52 - 2.23 (2.31 - 2.23)                            |
| Total reflections                                          | 54026 (3920)                                          |
| Unique reflections                                         | 27128 (2005)                                          |
| Multiplicity                                               | 2.0 (2.0)                                             |
| Completeness (%)                                           | 96.86 (72.64)                                         |
| $\langle I \rangle / \langle \sigma(I) \rangle$            | 13.67 (2.01)                                          |
| $R_{\text{merge}}$                                         | 0.0340 (0.360)                                        |
| $R_{\text{meas}}$                                          | 0.048 (0.509)                                         |
| Wilson <i>B</i> factor                                     | 41.61                                                 |
| CC <sub>1/2</sub>                                          | 1 (0.929)                                             |
| Refinement                                                 |                                                       |
| Reflections used in refinement                             | 27126 (2005)                                          |
| Reflections used for $R_{\text{free}}$                     | 1342 (98)                                             |
| $R_{\text{work}}$ (%)                                      | 0.177                                                 |
| $R_{\text{free}}$ (%)                                      | 0.224                                                 |
| Rmsd bond lengths (Å)                                      | 0.255                                                 |
| Rmsd bond angles (°)                                       | 2.82                                                  |
| Average <i>B</i> factors (Å <sup>2</sup> )/Number of atoms |                                                       |
| Macromolecules                                             | 46.28/3287                                            |
| Water molecules                                            | 50.94/179                                             |
| Ligand non-H atoms gppnhp-Mg <sup>2+</sup>                 | 51.70/160                                             |
| Φ/Ψ angles (%)                                             |                                                       |
| Ramachandran Most favored region (%)                       | 98.02                                                 |
| Ramachandran allowed region (%)                            | 1.98                                                  |
| Ramachandran outliers (%)                                  | 0.0                                                   |
| Rotamer outliers (%)                                       | 0.00                                                  |

Statistics for the highest-resolution shell are shown in parentheses.

$$R_{\text{merge}} = \sum (|I_h| - \langle I_h \rangle) / \sum \langle I_h \rangle$$

$$R_{\text{meas}} = \sum \sqrt{(n_h/n_h - 1)} (|I_h| - \langle I_h \rangle) / \sum \langle I_h \rangle$$

**Table S3.** Data Processing and Refinement Statistics for fRab27A-C123 covalently bound to **B01**

|                                                            |                                                       |
|------------------------------------------------------------|-------------------------------------------------------|
| Data Collection                                            |                                                       |
| Space group                                                | <i>P</i> 2 <sub>1</sub> 2 <sub>1</sub> 2 <sub>1</sub> |
| Unit cell parameters (Å)                                   | <i>a</i> = 61.38, <i>b</i> = 76.66, <i>c</i> = 118.24 |
| Wavelength (Å)                                             | 0.97949                                               |
| Resolution (Å)                                             | 64.33 - 2.32 (2.40 - 2.32)                            |
| Total reflections                                          | 49537 (4902)                                          |
| Unique reflections                                         | 24831 (2455)                                          |
| Multiplicity                                               | 2.0 (2.0)                                             |
| Completeness (%)                                           | 99.82 (99.67)                                         |
| $\langle I \rangle / \langle \sigma(I) \rangle$            | 9.77 (2.23)                                           |
| $R_{\text{merge}}$                                         | 0.059 (0.325)                                         |
| $R_{\text{meas}}$                                          | 0.083 (0.460)                                         |
| Wilson <i>B</i> factor                                     | 32.90                                                 |
| CC <sub>1/2</sub>                                          | 0.993 (0.832)                                         |
| Refinement                                                 |                                                       |
| Reflections used in refinement                             | 24809 (2448)                                          |
| Reflections used for $R_{\text{free}}$                     | 1209 (116)                                            |
| $R_{\text{work}}$ (%)                                      | 0.183                                                 |
| $R_{\text{free}}$ (%)                                      | 0.254                                                 |
| Rmsd bond lengths (Å)                                      | 0.008                                                 |
| Rmsd bond angles (°)                                       | 1.02                                                  |
| Average <i>B</i> factors (Å <sup>2</sup> )/Number of atoms |                                                       |
| Macromolecules                                             | 35.73/3449                                            |
| Water molecules                                            | 38.33/249                                             |
| Ligand non-H atoms gppnhp-Mg <sup>2+</sup>                 | 41.01/176                                             |
| Φ/Ψ angles (%)                                             |                                                       |
| Ramachandran Most favored region (%)                       | 96.59                                                 |
| Ramachandran allowed region (%)                            | 3.41                                                  |
| Ramachandran outliers (%)                                  | 0.0                                                   |
| Rotamer outliers (%)                                       | 0.84                                                  |

Statistics for the highest-resolution shell are shown in parentheses.

$$R_{\text{merge}} = \sum (|I_h| - \langle I_h \rangle) / \sum \langle I_h \rangle$$

$$R_{\text{meas}} = \sum \sqrt{(n_h/n_h - 1)} (|I_h| - \langle I_h \rangle) / \sum \langle I_h \rangle$$

**Table S4.** Data from intact mass spectrometry and qIT screen used for hit validation against fRab27A-C123 (top) and fRab27A-C188 (bottom).

**fRab27A-C123**

|             | REF        | qIT half-life | Mono-modification by intact protein MS  | MS half-life | Validated |
|-------------|------------|---------------|-----------------------------------------|--------------|-----------|
| CA32/228    | 4.2        | 21.4 h        | Yes: expect 250 Da, observed 252        | 34.3 h       | No        |
| CA84        | 2.3004E-12 | -             | Wrong mass: expect 255 Da, observed 326 | -            | No        |
| CA144 (B01) | 2.9        | 4.7 h         | Yes: expect 292 Da, observed 293        | 6.6 h        | Yes       |
| CA92        | 4.8        | -             | Wrong mass: expect 268 Da, observed 352 | -            | No        |

**fRab27A-C188**

|              | REF | qIT half-life | Mono-modification by intact protein MS  | MS half-life | Validated |
|--------------|-----|---------------|-----------------------------------------|--------------|-----------|
| CA32/228     | 7.6 | -             | Wrong mass: expect 250 Da, observed 359 | -            | No        |
| CA84         | 2.3 | -             | Protein degraded                        | -            | No        |
| CA89         | 1.6 | 4.3 h         | Yes: expect 284 Da, observed 282        | 7.4 h        | Yes       |
| CA144 (B01)  | 2.4 | 4.5 h         | Yes: expect 292 Da, observed 291        | 11.8 h       | No        |
| EL1062 (A01) | 2.5 | 26.2 h        | Yes: expect 231 Da, observed 231        | 32.5 h       | Yes       |
| EL1064       | 2.2 | 12.8 h        | Yes: expect 252 Da, observed 253        | 15.8 h       | Yes       |
| CA193        | 2   | -             | Wrong mass: expect 209 Da, observed 261 | -            | No        |
| CA187        | 1.7 | 4.3 h         | Yes: expect 252 Da, observed 250        | 13.2 h       | No        |
| CA53         | 5.7 | -             | No labelling                            | -            | No        |

## Materials and Methods

### Protein expression and purification

All Rab27A constructs contain the sequence for human Rab27A (UniProt entry P51159, residues 1–192, mutations: Q78L and C123S or C188S or both as specified), which was cloned into a pET15b vector (Invitrogen) including a N-terminal His-tag followed by a Tobacco Etch Virus (TEV) recognition site (ENLYFQ↓G). Fusion constructs also contain the C-terminus of Slp2a SHD1 (SFLTEEEQEAIMKVLQRDAALKRAEEER (residues 5–32)) linked to the N-terminus of Rab27A via a flexible poly glycine-serine linker (GSGSGSG). For protein expression, plasmids were transformed to *E. coli* BL21 cells and spread on LB agar plates containing 100 mg/L Ampicillin for selection. Single colonies were picked for amplification and incubated overnight into LB media containing 100 mg/L Ampicillin at 37 °C, shaking. Big scale cultures were inoculated using these overnight cultures at 1% v/v, and grown at 37 °C until absorbance at 600 nm reached 0.7. Protein expression was induced using 0.5 mM isopropyl β-D-1-thiogalactopyranoside (IPTG) at 37 °C for 3 hours. Subsequently cells were pelleted at 4k rpm for 10 min, then re-suspended in lysis buffer containing 500 mM NaCl, 10 mM imidazole, 5 mM MgCl<sub>2</sub> and 50 mM Tris at pH 8.0. Cells were lysed with a cell disruptor at 25K psi and centrifuged at 15k rpm for 45 min. The supernatant was loaded on Ni<sup>2+</sup>-NTA resin equilibrated with lysis buffer, washed extensively and eluted using buffer containing 500 mM NaCl, 300 mM imidazole, 5 mM MgCl<sub>2</sub> and 50 mM Tris at pH 8.0. The protein was dialyzed for 6 h using 100 mM NaCl, 5 mM MgCl<sub>2</sub> and 50 mM Tris, pH 8.0. Afterwards TEV protease (obtained in-house as previously described<sup>5</sup>) was added to the protein solution at a molar ratio of 1/20 in the presence of 1 mM DTT, and the solution was incubated overnight at 4 °C, shaking. The solution was dialyzed using 100 mM NaCl, 5 mM MgCl<sub>2</sub> and 50 mM Tris, pH 8 and then loaded on Ni<sup>2+</sup>-NTA resin. The flowthrough was collected, concentrated to 5.5 mg/mL in 150 mM NaCl, 5 mM MgCl<sub>2</sub>, 20 mM Tris pH 8 buffer. Then a 10x buffer containing 10 mM ZnCl<sub>2</sub> and 2 M (NH<sub>4</sub>)<sub>2</sub>SO<sub>4</sub>, 4 molar excess of GppNHp and 25 units of Antarctic phosphatase (New England Biolabs) were added to the solution and incubated overnight at 4 °C. Finally the sample was loaded on a superdex S-75 gel filtration column at a flow rate of 1 mL/min. The column was pre-equilibrated with 150 mM NaCl, 5 mM MgCl<sub>2</sub>, and 20 mM Tris at pH 8 for crystallography. The peaks corresponding to Rab27A constructs were analysed by SDS-PAGE, pooled, concentrated and flash frozen using liquid nitrogen. All Rab27A constructs containing exposed cysteines at C123 or C188 were purified in buffer containing an additional 0.1% β-mercaptoethanol (βME) during Ni<sup>2+</sup>-NTA steps.

### Protein labelling and purification

To a 15 mL falcon tube were added 600 μL of desired construct (100 μM stock), 100 μL of 50% w/v TCEP-agarose beads (ThermoFisher), and 1.8 mL of 100 mM NaCl, 5 mM MgCl<sub>2</sub>, and 20 mM HEPES pH 8.0. 50 μL of ligand (50 mM stock) were diluted with 2.45 mL of 100 mM NaCl, 5 mM MgCl<sub>2</sub>, and 20 mM HEPES pH 8.0, followed by centrifugation (2400 rpm, 5 min). The supernatant was added to the protein mixture and incubated at 4 °C. The reaction was monitored as described in the QIT protocol (*v. infra*). When the labelling reached 90%, the labelled protein solution was concentrated to 0.5 mL by using a Vivaspin 20 filter (5000 MWCO). The protein was diluted with 4.5 mL of 100 mM NaCl, 5 mM MgCl<sub>2</sub>, and 20 mM HEPES pH 8.0 and concentrated again to 0.5 mL (5x), to remove excess compound, then purified by superdex S-75 gel filtration at a flow rate of 1 mL/min in 150 mM NaCl, 5 mM MgCl<sub>2</sub>, and 20 mM Tris at pH 8 for crystallography.

### Protein crystallisation

Pure samples of fRab27A-C188 labelled with **A01** and fRab27A-C123 labelled with **B01** were concentrated to 15 mg/mL, in buffer containing 150 mM NaCl, 5 mM MgCl<sub>2</sub>, and 20 mM Tris at pH 8.0. Crystals were grown at 4 °C using the sitting-drop vapor-diffusion method with a mother liquor containing 120 mM MgCl<sub>2</sub>, 50 mM bis-Tris, and 15% 2-propanol, pH 6.8.

### Crystal diffraction, data collection and data processing

Data collections were carried out at i02 beamline in Diamond Light Source (Oxford, UK) at 100K of temperature, wavelength 0.9795 Å, and using a Pilatus detector. Data were collected at 0.2°-0.5° oscillations per image and 200° total oscillation per crystal. Data was integrated, scaled and reduced using DIALS.<sup>6</sup> Initial phases were calculated using the molecular replacement program Phaser.<sup>7</sup> The coordinates of Rab27A from chain A of the Rab27A-Slp2a complex (PDB:3BC1) without the nucleotide and the magnesium ion were used as the search model. Subsequently, the initial model generated by phaser was refined through an iterative cycle using COOT<sup>9</sup> and REFMAC5.<sup>10</sup> Final model structures were validated using the Molprobit server<sup>11</sup> at <http://molprobit.biochem.duke.edu>. All structure images were prepared using Pymol (DeLano Scientific LLC, <http://pymol.sourceforge.net/>). X-ray data collection, processing and refinement statistics are given in Table S1.

### Molecular dynamics simulations

The Rab27A structure (PDB: 3BC1) was simulated with bound GTP and Mg<sup>2+</sup>. The structure was parametrised using the latest CHARMM36 force field<sup>4</sup>, solvated with Tip3p waters<sup>12</sup> and neutralised with Na<sup>+</sup> and Cl<sup>-</sup> ions at a concentration of 150 mM. Temperature was coupled for 100 ps at 300 K with the V-rescale method,<sup>13</sup> with positional restraints on the protein heavy atoms. Pressure was then coupled at 1 bar for another 100 ps with position restraints, using the Berendsen algorithm.<sup>14</sup> The Particle mesh Ewald method<sup>15</sup> was used for electrostatic interactions, and LINCS<sup>16</sup> to define the constraints. The integration timestep was 2 fs. The final production simulation was extended for 250 ns. The simulation and data analysis were carried out using the GROMACS simulation package.<sup>17</sup>

### qIT assay for screening and hit validation

126 electrophilic acrylamides (see supplementary excel file) were screened in the qIT assay adapted from Craven *et al*<sup>18</sup>. Briefly, the reaction buffer (20 mM HEPES pH 8.0, 100 mM NaCl, 5 mM MgCl<sub>2</sub>) and quench buffer (20 mM HEPES pH 7.4, 100 mM NaCl, 5 mM MgCl<sub>2</sub>) were prepared, filtered, de-gassed, and re-gassed with Ar for 15 min on ice. Reaction setup: To each well of a 96-well PCR plate (reaction plate), 8 µL of 50% w/v TCEP-agarose beads in reaction buffer was added, followed by the addition of 92 µL of 10.87 µM protein or glutathione (GSH). In a separate 96-well PCR plate (ligand plate), 3 µL of DMSO or 50 mM ligand in DMSO was added to 147 µL reaction buffer and centrifuged (1k rpm, 5 min, 4 °C). 100 µL of ligand solution or DMSO control from the ligand plate was added to the reaction plate (final concentration: 5 µM protein/GSH and 500 µM ligand). After mixing, the TCEP-agarose beads were pelleted by centrifugation (1k rpm, 5 min, 4 °C) and the plate was kept at 4 °C.



At a series of time points ( $t = 0.25, 1, 2, 4, 7, 24, 48, 72$ , and  $96$  h), a  $3\ \mu\text{L}$  aliquot in duplicate from the reaction plate was quenched in a black 384-well plate, in which each well was pre-filled with  $27\ \mu\text{L}$  of 7-Diethylamino-3-(4'-Maleimidylphenyl)-4-Methylcoumarin (CPM) solution ( $1.4\ \mu\text{M}$  in quench buffer). The fluorescence plate was spun down ( $1\text{ k rpm}$ ,  $1\text{ min}$ ) and incubated for  $60\text{ min}$  at room temperature and then fluorescence intensity (excitation/emission:  $384/470\text{ nm}$ ) was measured on an EnVision™ plate reader.

Data analysis: All analyses were conducted using Prism 9.0 software (Graphpad). Each fluorescence readout was normalized to the average of the DMSO controls. The normalized fluorescence was plotted against time. A one phase exponential decay was fitted to each plot (constraints:  $Y(0) > 0.8$ ;  $0 < \text{plateau} < 0.3$ ;  $k > 0$ ). Data from at least three independent assay replicates were used to generate the graphs in Fig. S5.

### qIT assay for $k_{\text{inact}}/K_i$ determination

The  $k_{\text{inact}}/K_i$  values were determined from data obtained performing the qIT assay at different compound concentrations (eight 1:1.5 dilutions starting from  $250\ \mu\text{M}$ ) at room temperature, quenching at different time-points ( $t = 10, 20, 30, 60, 120, 180, 240, 360, 1440\text{ min}$ ). Kinetic curves of thiol labelling over time were used to estimate  $k_{\text{obs}}$  values, which were then plotted against inhibitor concentration. The resulting linear data were analysed by linear regression to obtain  $k_{\text{inact}}/K_i$  values.

### Peptide mass fingerprint analysis

$5\ \mu\text{g}$  labelled or unlabelled recombinant Rab27A construct were run on a 12% SDS-PAGE gel and stained by Coomassie Blue. The expected band was excised and washed in  $150\ \mu\text{L}$  of 50% v/v MeCN/ $\text{H}_2\text{O}$  for  $5\text{ min}$  at rt, shaking. The supernatant was discarded, and the solid was washed with  $150\ \mu\text{L}$  of 50% v/v MeCN/ $50\text{ mM NH}_4\text{HCO}_3$  for  $30\text{ min}$  at rt, shaking. The supernatant was discarded, and the solid was washed with  $150\ \mu\text{L}$  of 50% v/v MeCN/ $10\text{ mM NH}_4\text{HCO}_3$  for  $30\text{ min}$  at rt, shaking. The supernatant was dried *in vacuo* for  $30\text{ min}$  at  $45\text{ }^\circ\text{C}$ , then  $15\ \mu\text{L}$  of Trypsin ( $20\ \mu\text{g}/100\ \mu\text{L}$  in  $50\text{ mM NH}_4\text{HCO}_3$ ) were added. After  $10\text{ min}$  at rt, the mixture was diluted with  $15\ \mu\text{L}$  of  $10\text{ mM NH}_4\text{HCO}_3$  and incubated overnight at  $37\text{ }^\circ\text{C}$ , shaking. The supernatant was diluted 1:1 with  $\alpha$ -Cyano-4-hydroxycinnamic acid ( $10\text{ mg/mL}$  in 50% v/v MeCN/ $\text{H}_2\text{O}$  with 0.1% TFA) and analysed by MALDI-QTOF.

## Chemical Synthesis

### Abbreviations

DMF (dimethylformamide), EtOAc (ethyl acetate), FCC (flash column chromatography), rt (room temperature), TFA (trifluoroacetic acid), THF (tetrahydrofuran), TLC (thin layer chromatography)

### General Information

All chemicals were purchased from Sigma-Aldrich, Apollo Scientific, Acros Organics, Alfa Aesar and used without further purification unless otherwise indicated. All reactions were monitored by thin layer chromatography (TLC) using UV for visualisation unless otherwise stated. Compounds were purified using either an automated system using pre-packed silica cartridges with UV detection or by manual columns using an appropriate solvent mixture as detailed.  $^1\text{H}$  and  $^{13}\text{C}$  NMR spectra were recorded on 400 MHz and 101 MHz respectively Bruker AV instruments at room temperature unless specified otherwise and were referenced to residual solvent signals. Data are presented as follows: chemical shift in ppm, multiplicity (br = broad, app = apparent, s = singlet, d = doublet, t = triplet, q = quartet, p = pentet, m = multiplet), coupling constants in Hz, integration, and rotameric conformation if applicable. High-resolution mass spectrometry (HRMS) and intact mass spectrometry data were obtained by the Imperial Mass Spectrometry facility.  $m/z$  values are reported in Daltons (Da) to the nearest 0.0001 Da.

### Scheme S1. Synthesis of hit fragment **A01**

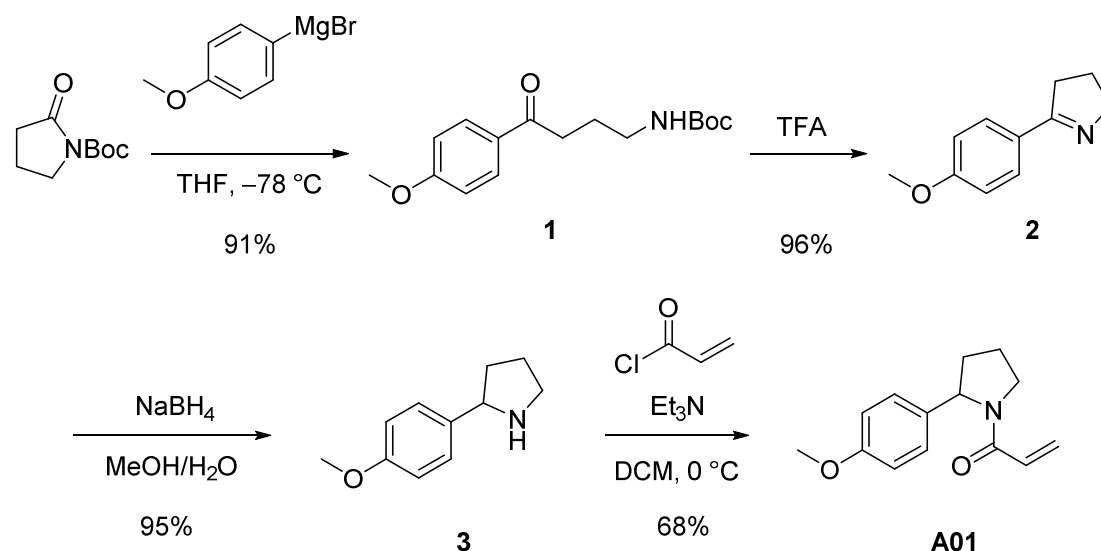

***tert*-butyl (4-(4-methoxyphenyl)-4-oxobutyl)carbamate (1)**

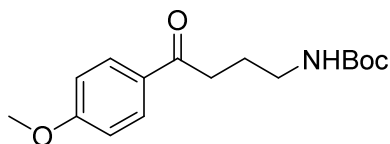

(4-Methoxyphenyl)magnesium bromide (0.5 M in THF, 24 mL, 12 mmol) was added dropwise over 30 min at  $-78^{\circ}\text{C}$  to a stirred solution of *tert*-butyl 2-oxopyrrolidine-1-carboxylate (1.7 mL, 10 mmol) in THF (40 mL). The reaction was stirred for 1 h at  $-78^{\circ}\text{C}$ , then slowly warmed to rt and stirred for 1 h before the pH was adjusted to 1–3 using 1 M HCl. The solution was concentrated *in vacuo*, then diluted with  $\text{CH}_2\text{Cl}_2$  (70 mL) and  $\text{NaHCO}_3$  (70 mL), and the aqueous layer extracted with  $\text{CH}_2\text{Cl}_2$  (3  $\times$  50 mL). The combined organic layers were dried over  $\text{MgSO}_4$ , filtered, concentrated *in vacuo*. The crude product was purified by FCC (6%–60% EtOAc/hexane) to give the title compound **1** as a white amorphous solid (2.7 g, 91%).

**$^1\text{H}$  NMR** (400 MHz,  $\text{CDCl}_3$ )  $\delta$  7.95–7.92 (2H, m), 6.94–6.91 (2H, m), 4.67 (br, 1H, NH), 3.87 (3H, s), 3.24–3.19 (2H, m), 2.97 (2H, t,  $J = 7.2$  Hz), 1.92 (2H, p,  $J = 7.0$  Hz), 1.42 (9H, s) ppm

**$^{13}\text{C}$  NMR** (101 MHz,  $\text{CDCl}_3$ )  $\delta$  198.5, 163.6, 156.2, 130.4, 130.1, 113.9, 79.3, 55.6, 40.4, 35.5, 28.5, 24.8 ppm

**5-(4-methoxyphenyl)-3,4-dihydro-2H-pyrrole (2)**

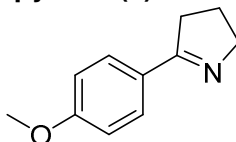

Ketone **1** (0.59 g, 2.0 mmol) was stirred in neat TFA (1.5 mL) at rt for 3.5 h. After the reaction was complete by TLC, the mixture was cooled to  $0^{\circ}\text{C}$  and 50% w/v NaOH solution was added to the mixture until pH 13–14. The aqueous layer was extracted with  $\text{CH}_2\text{Cl}_2$  (3  $\times$  25 mL), then the combined organic layers were dried over  $\text{MgSO}_4$ , filtered, and concentrated *in vacuo* to afford the title compound **2** as a white crystalline solid which was used without further purification (0.34 g, 96%).

**$^1\text{H}$  NMR** (400 MHz,  $\text{CDCl}_3$ )  $\delta$  7.82–7.78 (2H, m), 6.94–6.90 (2H, m), 4.04 (2H, tt,  $J = 7.3$ , 1.9 Hz), 3.84 (3H, s), 2.95–2.90 (2H, m), 2.06–1.99 (2H, m) ppm

**$^{13}\text{C}$  NMR** (101 MHz,  $\text{CDCl}_3$ )  $\delta$  172.9, 161.5, 129.4, 127.5, 113.9, 61.4, 55.5, 35.0, 22.8 ppm

**HRMS** (ES)  $m/z$  Calculated for  $\text{C}_{11}\text{H}_{14}\text{NO}$   $[\text{M}+\text{H}]^+$  176.1075, found 176.1080 ( $\Delta$  2.8 ppm)

### 2-(4-methoxyphenyl)pyrrolidine (3)

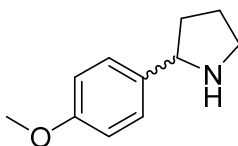

To a stirring solution of imide **2** (0.30 g, 1.7 mmol) in MeOH/H<sub>2</sub>O 4:1 (2.0 mL) was added NaBH<sub>4</sub> (78 mg, 2.0 mmol) and the reaction was stirred for 20 h at rt. Additional NaBH<sub>4</sub> (20 mg, 0.8 mmol) was added and the reaction was stirred until completion as monitored by TLC. The reaction mixture was acidified with 1 M HCl to pH 1–3 and stirred for an additional 30 min, then 1 M NaOH was added until pH 13–15. The aqueous layer was extracted with CH<sub>2</sub>Cl<sub>2</sub> (3x 10 mL). The combined organic layers were dried over MgSO<sub>4</sub>, filtered, and concentrated *in vacuo* to give the title compound **3** as a yellow oil (81 mg, 95%), which was used without further purification.

**<sup>1</sup>H NMR** (400 MHz, CDCl<sub>3</sub>) δ 7.30–7.26 (2H, m), 6.87–6.84 (2H, m), 4.05 (1H, t, *J* = 7.8 Hz), 3.79 (3H, s), 3.19 (1H, ddd, *J* = 10.3, 7.8, 5.3 Hz), 2.98 (1H, ddd, *J* = 10.3, 8.4, 6.6 Hz), 2.24 (1H, br s), 2.18–2.11 (1H, m), 1.99–1.78 (2H, m), 1.72–1.59 (1H, m) ppm

**<sup>13</sup>C NMR** (100 MHz, CDCl<sub>3</sub>) δ 158.6, 136.6, 127.8, 113.9, 62.3, 55.4, 47.0, 34.3, 25.7 ppm

**HRMS** (ES) *m/z* Calculated for C<sub>11</sub>H<sub>16</sub>NO [M+H]<sup>+</sup> 178.1232, found 178.1232 (Δ 0.0 ppm)

### 1-(2-(4-methoxyphenyl)pyrrolidin-1-yl)prop-2-en-1-one (A01)

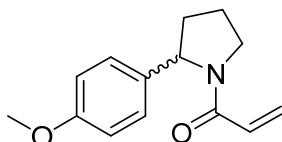

To a stirred solution of amine **3** (89 mg, 0.50 mmol) and Et<sub>3</sub>N (0.10 mL, 0.75 mmol) in CH<sub>2</sub>Cl<sub>2</sub> (1.5 mL) at 0 °C was added acryloyl chloride (49 μL, 0.60 mmol) in CH<sub>2</sub>Cl<sub>2</sub> (0.50 mL) dropwise. The reaction was allowed to warm to rt, stirred for 2 h, diluted with CH<sub>2</sub>Cl<sub>2</sub> (10 mL) and then quenched by slow addition of NaHCO<sub>3</sub> (10 mL). The aqueous layer was extracted with CH<sub>2</sub>Cl<sub>2</sub> (2x 10 mL) then the combined organic layers were dried over MgSO<sub>4</sub>, filtered, and concentrated *in vacuo*. Purification by FCC (12%–100% EtOAc/hexanes) afforded the title compound **A01** as a clear, colourless oil (79 mg, 68%).

**<sup>1</sup>H NMR** (400 MHz, CDCl<sub>3</sub>) *Rotameric ratio maj:min 0.76:0.24*; δ 7.09–7.03 (2H, m), 6.86–6.79 (2H, m), 6.53 (1H, dd, *J* = 16.8, 10.3 Hz, min. rot.), 6.34 (1H, dd, *J* = 16.8, 2.1 Hz, maj. rot.), 6.29 (1H, dd, *J* = 16.8, 2.2 Hz, maj. rot.), 6.12 (1H, dd, *J* = 16.7, 10.3 Hz, maj. rot.), 5.66 (1H, dd, *J* = 10.3, 2.2 Hz, min. rot.), 5.44 (1H, dd, *J* = 10.2, 2.2 Hz, maj. rot.), 5.21 (1H, dd, *J* = 8.0, 3.2 Hz, min. rot.), 5.00 (1H, dd, *J* = 7.8, 2.0 Hz, maj. rot.), 3.83–3.78 (1H, m), 3.77 (3H, s, maj. rot.), 3.74 (3H, s, min. rot.), 3.72–3.65 (1H, m), 2.38–2.18 (1H, m), 2.01–1.80 (3H, m) ppm

**<sup>13</sup>C NMR** (100 MHz, CDCl<sub>3</sub>) δ 165.4 (maj. rot.), 164.4 (min. rot.), 158.8 (maj. rot.), 158.4 (min. rot.), 135.4 (maj. rot.), 135.0 (min. rot.), 129.0 (maj. rot.), 128.8 (min. rot.), 128.0 (min. rot.), 127.4 (maj. rot.), 126.7 (min. rot.), 126.6 (maj. rot.), 114.1 (maj. rot.), 113.9 (min. rot.), 60.8 (maj. rot.), 60.2 (min. rot.), 55.3, 47.6 (min. rot.), 47.1 (maj. rot.), 36.4 (maj. rot.), 34.0 (min. rot.), 23.9 (min. rot.), 21.6 (maj. rot.) ppm

**HRMS** (ES) *m/z* Calculated for C<sub>14</sub>H<sub>18</sub>NO<sub>2</sub> [M+H]<sup>+</sup> 232.1338, found 232.1340 (Δ 0.9 ppm)

**Scheme S2. Synthesis of hit fragment B01**

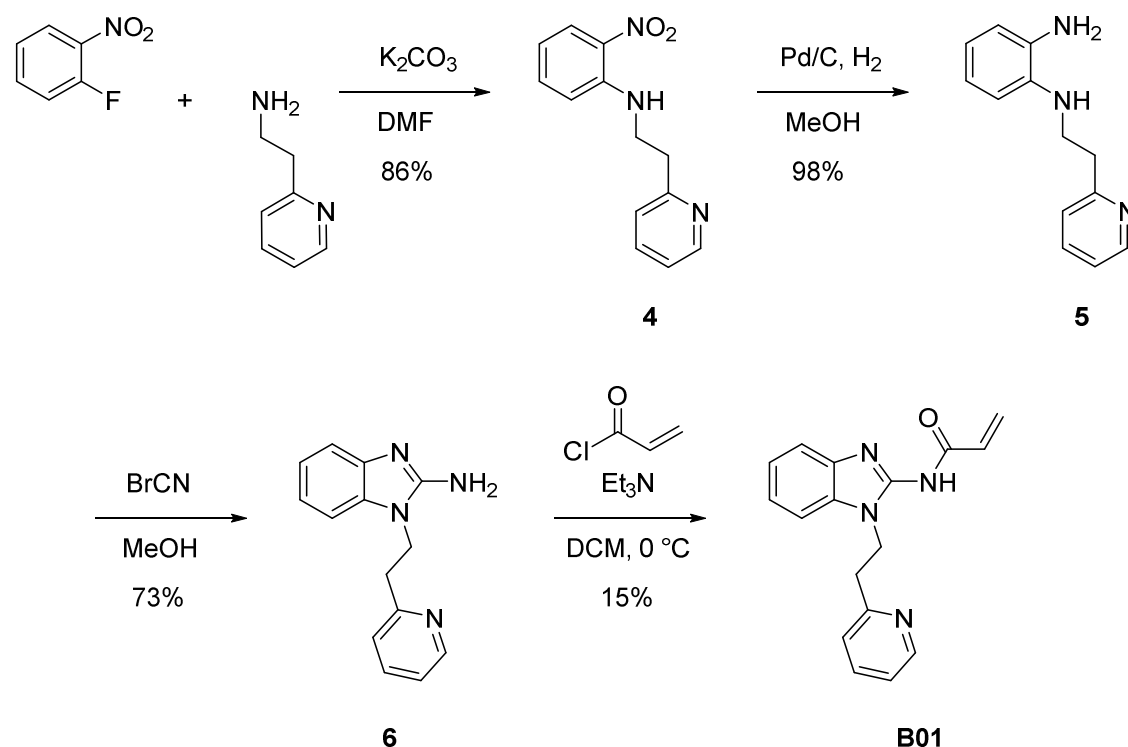

**2-nitro-N-(2-(pyridin-2-yl)ethyl)aniline (4)**

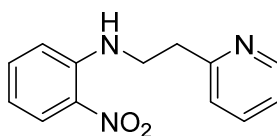

1-Fluoro-2-nitrobenzene (0.42 mL, 4.0 mmol), 2-(2-aminoethyl)pyridine (0.48 mL, 4.0 mmol) and K<sub>2</sub>CO<sub>3</sub> (1.1 g, 8.0 mmol) were dissolved in DMF (10 mL) and stirred at rt for 24 h. The reaction mixture was then diluted with EtOAc (50 mL) and NaHCO<sub>3</sub> (50 mL). The aqueous layer was extracted with EtOAc (3× 50 mL), then the combined organic layers were washed with 5% LiCl (30 mL) and brine (30 mL), dried over MgSO<sub>4</sub>, filtered and concentrated *in vacuo*. Purification by

FCC (12%–100% EtOAc/hexane) afforded the title compound **4** as a bright orange oil (0.83 g, 86%).

**<sup>1</sup>H NMR** (400 MHz, CDCl<sub>3</sub>) δ 8.58 (1H, ddd, *J* = 4.9, 1.8, 0.9 Hz), 8.29 (1H, br s, NH), 8.12 (1H, dd, *J* = 8.7, 1.7 Hz), 7.61 (1H, dt, *J* = 7.7, 1.8 Hz), 7.40 (1H, ddd, *J* = 8.6, 7.0, 1.6 Hz), 7.20 (1H, d, *J* = 7.7 Hz), 7.15 (1H, ddd, *J* = 7.5, 4.9, 1.1 Hz), 6.90 (1H, d, *J* = 8.5 Hz), 6.60 (1H, ddd, *J* = 8.5, 6.9, 1.2 Hz), 3.73 (2H, dt, *J* = 6.8, 5.3 Hz), 3.17 (2H, t, *J* = 6.8 Hz) ppm

**<sup>13</sup>C NMR** (101 MHz, CDCl<sub>3</sub>) δ 158.5, 149.8, 145.4, 136.8, 136.3, 132.0, 126.9, 123.5, 121.9, 115.3, 113.8, 42.7, 37.3 ppm

**HRMS** (ES) *m/z* Calculated for C<sub>13</sub>H<sub>14</sub>N<sub>3</sub>O<sub>2</sub> [M+H]<sup>+</sup> 244.1086, found 244.1090 (Δ 1.6 ppm)

#### ***N'*-(2-(pyridin-2-yl)ethyl)benzene-1,2-diamine (5)**

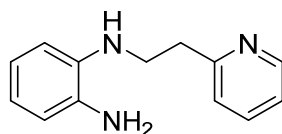

Pyridine **4** (0.65 mg, 2.7 mmol) was dissolved in MeOH (6.0 mL) and Pd/C (10%, 65.0 mg) was added. The reaction mixture was degassed and flushed with H<sub>2</sub> three times, then stirred at rt until reaction was complete by TLC. The reaction was filtered through celite to afford the title compound **5** as a dark brown oil (0.56 g, 98%), which was used without further purification.

**<sup>1</sup>H NMR** (400 MHz, CDCl<sub>3</sub>) δ 8.57 (1H, d, *J* = 4.6 Hz), 7.60 (1H, t, *J* = 7.7 Hz), 7.18 (1H, d, *J* = 7.8 Hz), 7.14 (1H, t, *J* = 6.2 Hz), 6.85–6.81 (1H, m), 6.73 (1H, d, *J* = 7.9 Hz), 6.71–6.66 (2H, m), 3.64 (3H, br), 3.53 (2H, t, *J* = 6.7 Hz), 3.14 (2H, t, *J* = 6.7 Hz) ppm

**<sup>13</sup>C NMR** (101 MHz, CDCl<sub>3</sub>) δ 159.9, 149.3, 137.4, 136.5, 134.6, 123.3, 121.5, 120.4, 118.7, 116.2, 112.0, 44.0, 37.5 ppm

**HRMS** (ES) *m/z* Calculated for C<sub>13</sub>H<sub>16</sub>N<sub>3</sub> [M+H]<sup>+</sup> 214.1344, found 214.1346 (Δ 0.2 ppm)

#### **1-(2-(pyridin-2-yl)ethyl)-1*H*-benzo[d]imidazol-2-amine (6)**

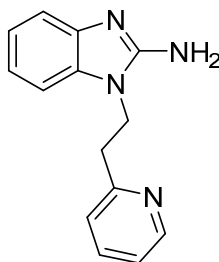

Aniline **5** (0.57 mg, 2.7 mmol) was dissolved in MeOH (20 mL), then cyanogen bromide (0.60 g, 4.0 mmol) was added to the solution. The reaction was stirred at rt for 2 h, and then concentrated *in vacuo*. The residue was diluted with EtOAc (60 mL) and 1 M NaOH (50 mL), and the aqueous layer extracted with EtOAc (3× 60 mL). The combined organic layers were washed with brine (50 mL), dried over Na<sub>2</sub>SO<sub>4</sub>, filtered and concentrated *in vacuo*. Purification by FCC (5% MeOH/CH<sub>2</sub>Cl<sub>2</sub>, 0.5% NH<sub>4</sub>OH) afforded the title compound **6** as a purple-grey powder (0.46 g, 73%).

R<sub>f</sub> 0.39 (10% MeOH/CH<sub>2</sub>Cl<sub>2</sub>, 0.5% NH<sub>4</sub>OH)

**<sup>1</sup>H NMR** (400 MHz, CDCl<sub>3</sub>) δ 8.54 (1H, ddd, *J* = 4.9, 1.6, 0.7 Hz), 7.51 (1H, dt, *J* = 7.7, 1.8 Hz), 7.36 (1H, m), 7.16–7.03 (4H, m), 6.98 (1H, d, *J* = 7.9 Hz), 5.41 (2H, br), 4.48 (2H, t, *J* = 6.0 Hz), 3.32 (2H, t, *J* = 6.1 Hz) ppm

**<sup>13</sup>C NMR** (101 MHz, CDCl<sub>3</sub>) δ 157.4, 154.5, 149.0, 141.8, 137.1, 134.1, 124.4, 122.3, 121.6, 119.7, 116.2, 107.5, 40.7, 36.6 ppm

**HRMS** (ES) *m/z* Calculated for C<sub>14</sub>H<sub>15</sub>N<sub>4</sub> [M+H]<sup>+</sup> 239.1297, found 239.1297 (Δ 0.0 ppm)

#### ***N*-(1-(2-(pyridin-2-yl)ethyl)-1*H*-benzo[*d*]imidazol-2-yl)acrylamide (B01)**

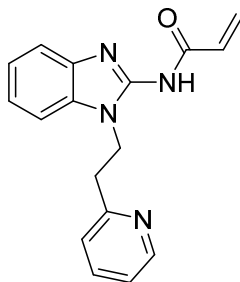

Acryloyl chloride (31 μL, 0.39 mmol) was dissolved in CH<sub>2</sub>Cl<sub>2</sub> (1.0 mL) and the resulting solution was added dropwise to a stirring solution of benzimidazole **6** (92 mg, 0.39 mmol) and Et<sub>3</sub>N (81 μL, 0.58 mmol) in CH<sub>2</sub>Cl<sub>2</sub> (1.0 mL) at 0 °C. The reaction was then allowed to warm to rt, stirred for 2 h, diluted with CH<sub>2</sub>Cl<sub>2</sub> (10 mL) and then quenched by addition of NaHCO<sub>3</sub> (10 mL). The aqueous layer was extracted with CH<sub>2</sub>Cl<sub>2</sub> (3× 10 mL), then the combined organic layers were dried over MgSO<sub>4</sub>, filtered, and concentrated *in vacuo*. Purification by FCC (25%–100% EtOAc/hexane) afforded the title compound as a white solid (9.6 mg, 10%).

**<sup>1</sup>H NMR** (400 MHz, CDCl<sub>3</sub>) δ 12.30 (s, 1H), 8.58 (ddd, *J* = 4.9, 1.9, 0.9 Hz, 1H), 7.51 (td, *J* = 7.7, 1.9 Hz, 1H), 7.31–7.25 (m, 1H), 7.21–7.10 (m, 4H), 7.06 (dt, *J* = 7.8, 1.1 Hz, 1H), 6.47 (d, *J* = 6.0 Hz, 2H), 5.76–5.64 (m, 1H), 4.59 (dd, *J* = 7.6, 6.7 Hz, 2H), 3.33 (t, *J* = 7.1 Hz, 2H) ppm

**<sup>13</sup>C NMR** (101 MHz, CDCl<sub>3</sub>) δ 176.5, 158.0, 153.5, 149.5, 137.1, 136.5, 129.6, 126.0, 123.7, 122.9, 122.8, 121.9, 111.2, 109.4, 42.0, 36.7 ppm

**HRMS** (ES) *m/z* Calculated for C<sub>12</sub>H<sub>15</sub>N<sub>4</sub> [M+H]<sup>+</sup> 215.1297, found 215.1297 (Δ 0.0 ppm)

**NMR spectra for A01 and B01**



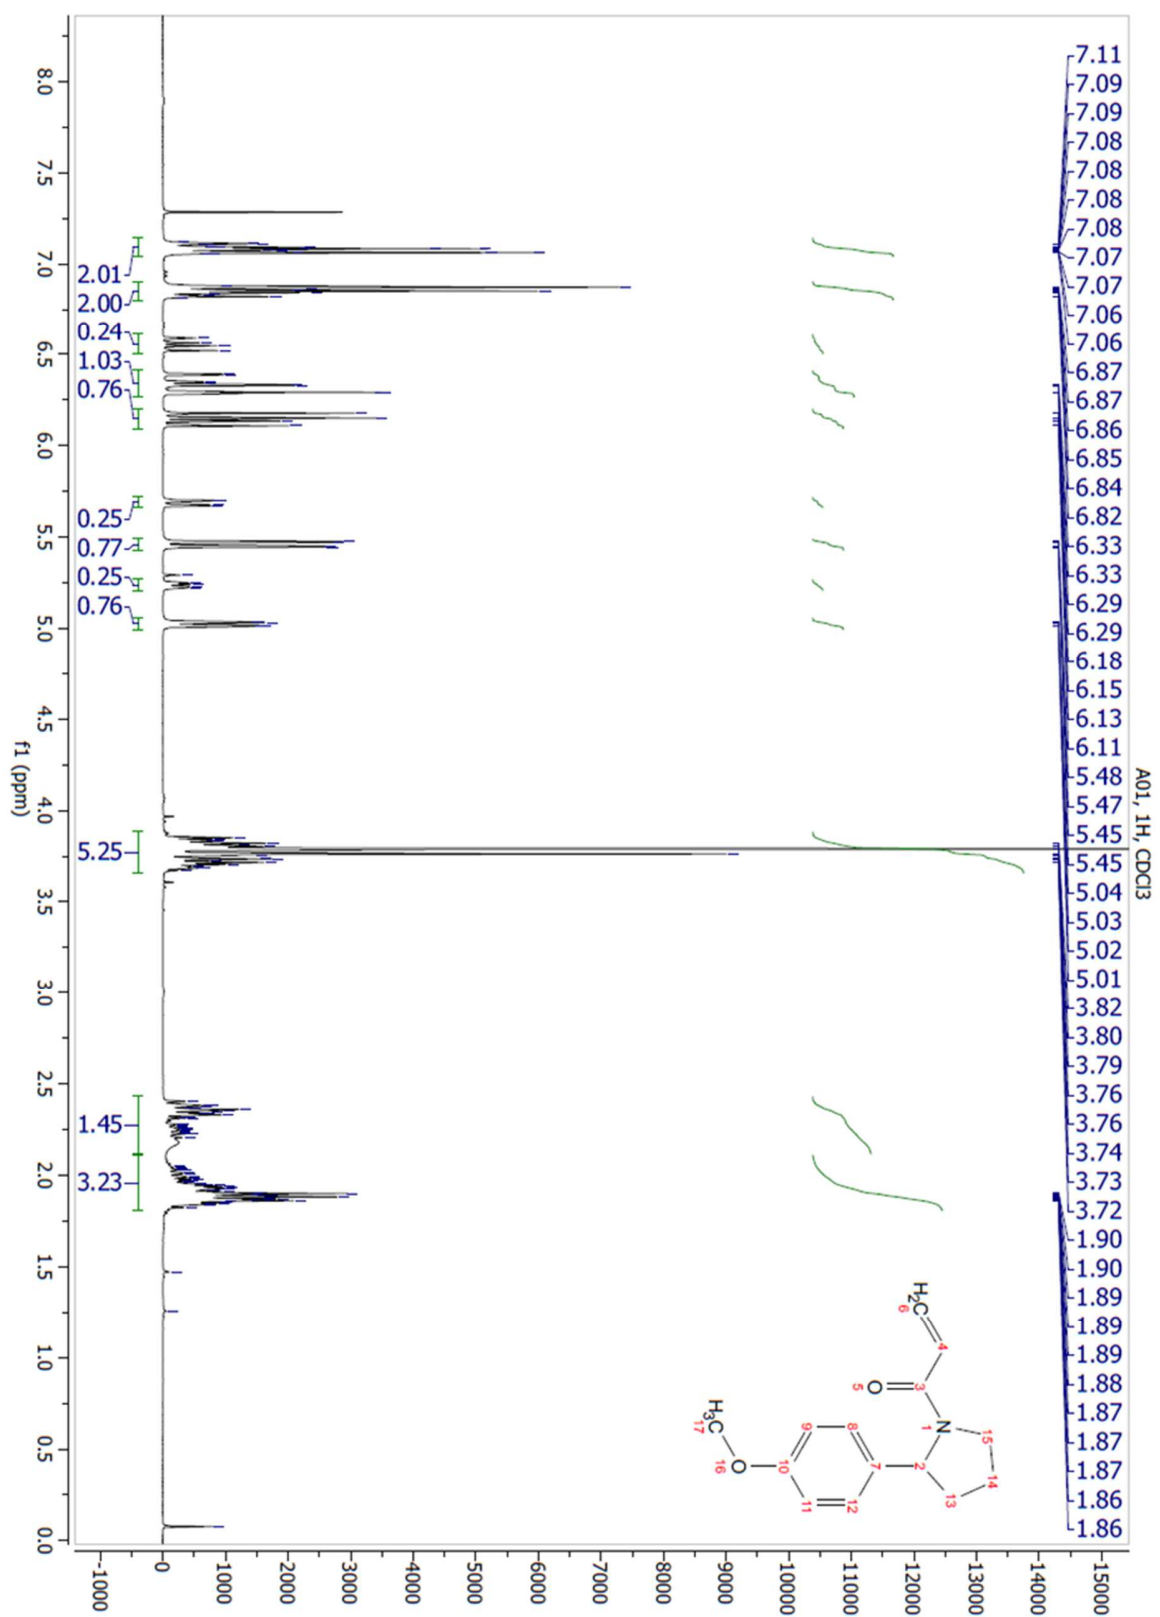

A01, <sup>13</sup>C, CDCl<sub>3</sub>

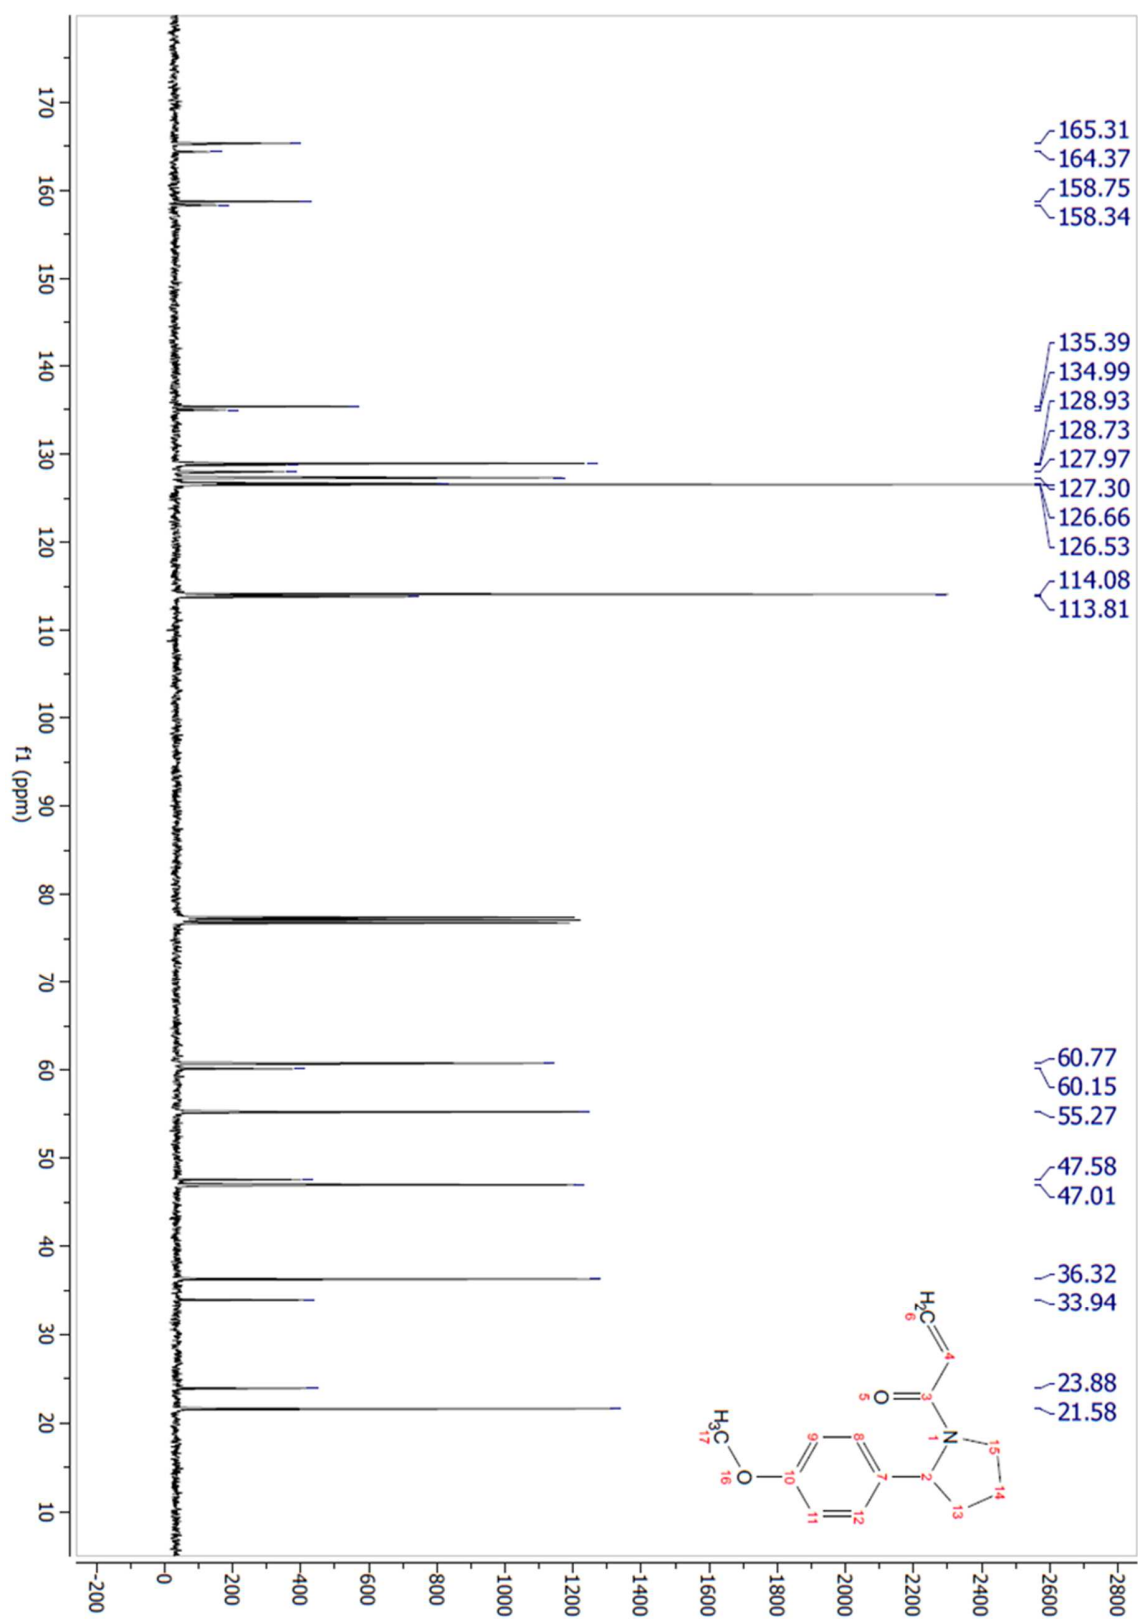

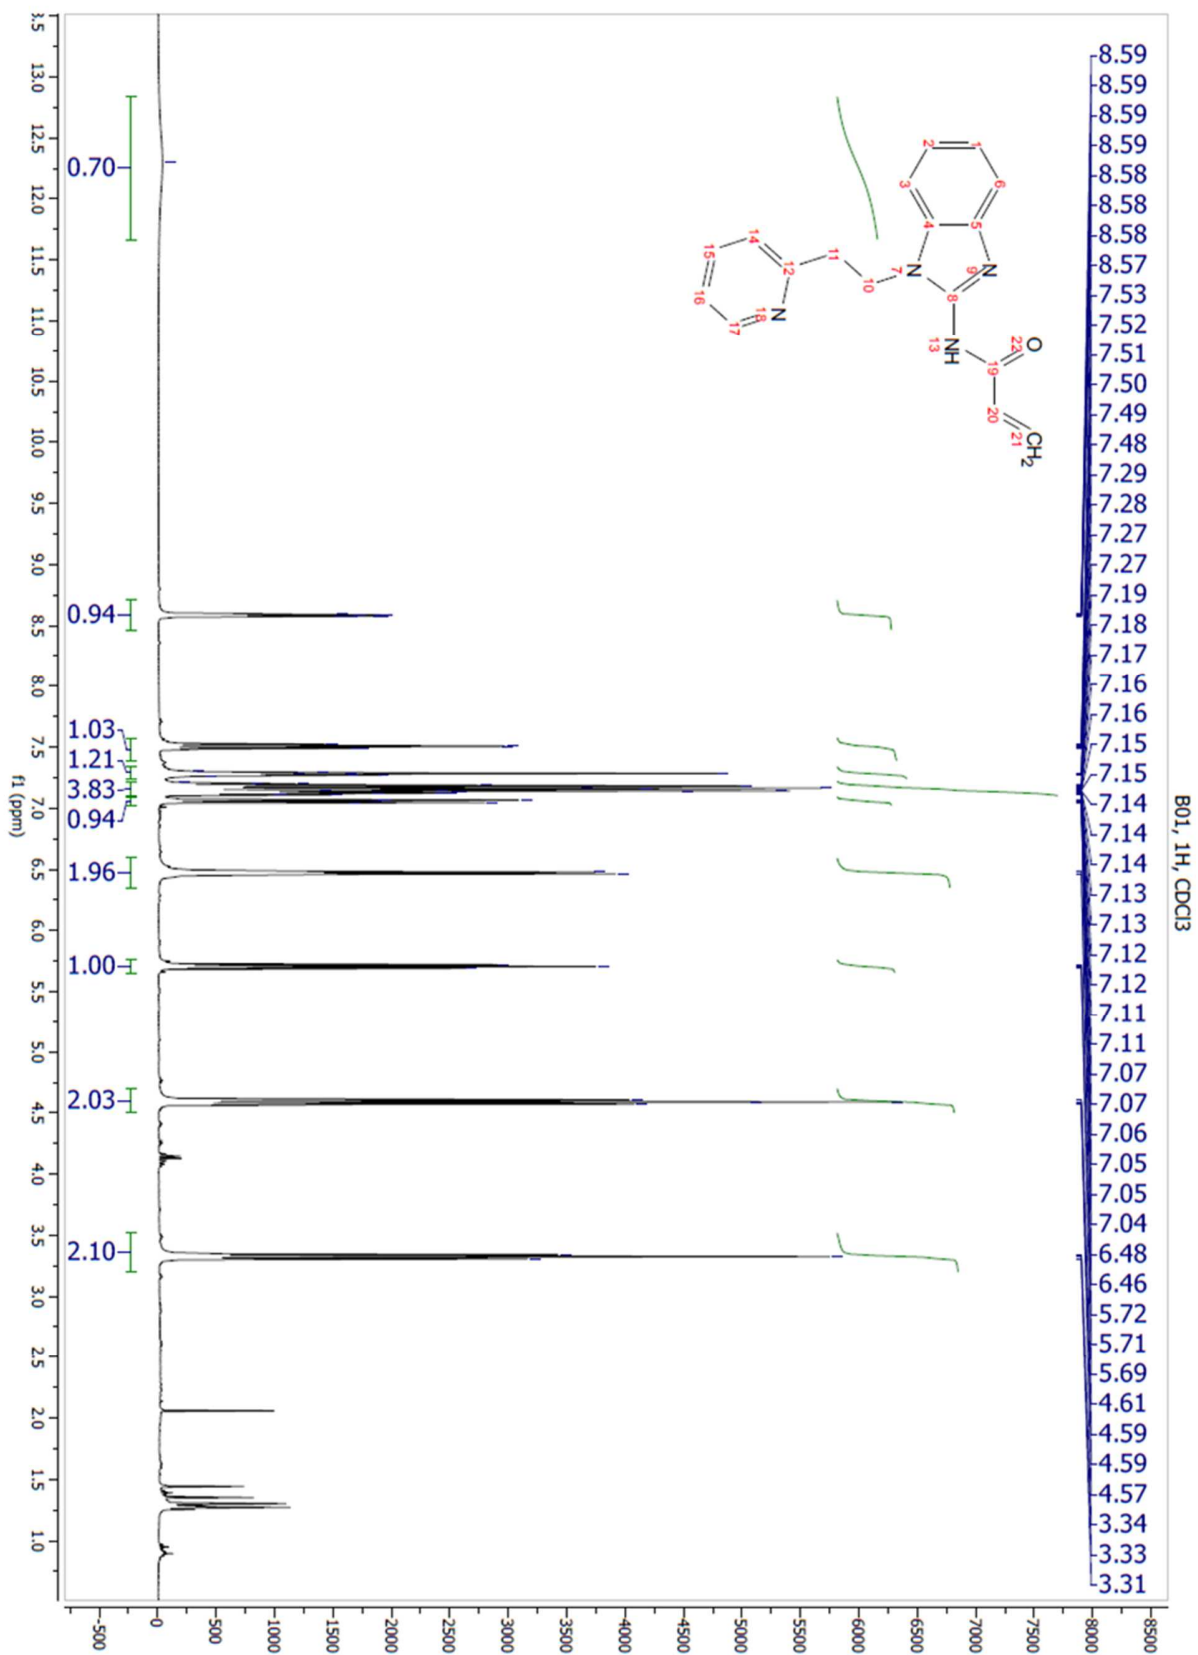

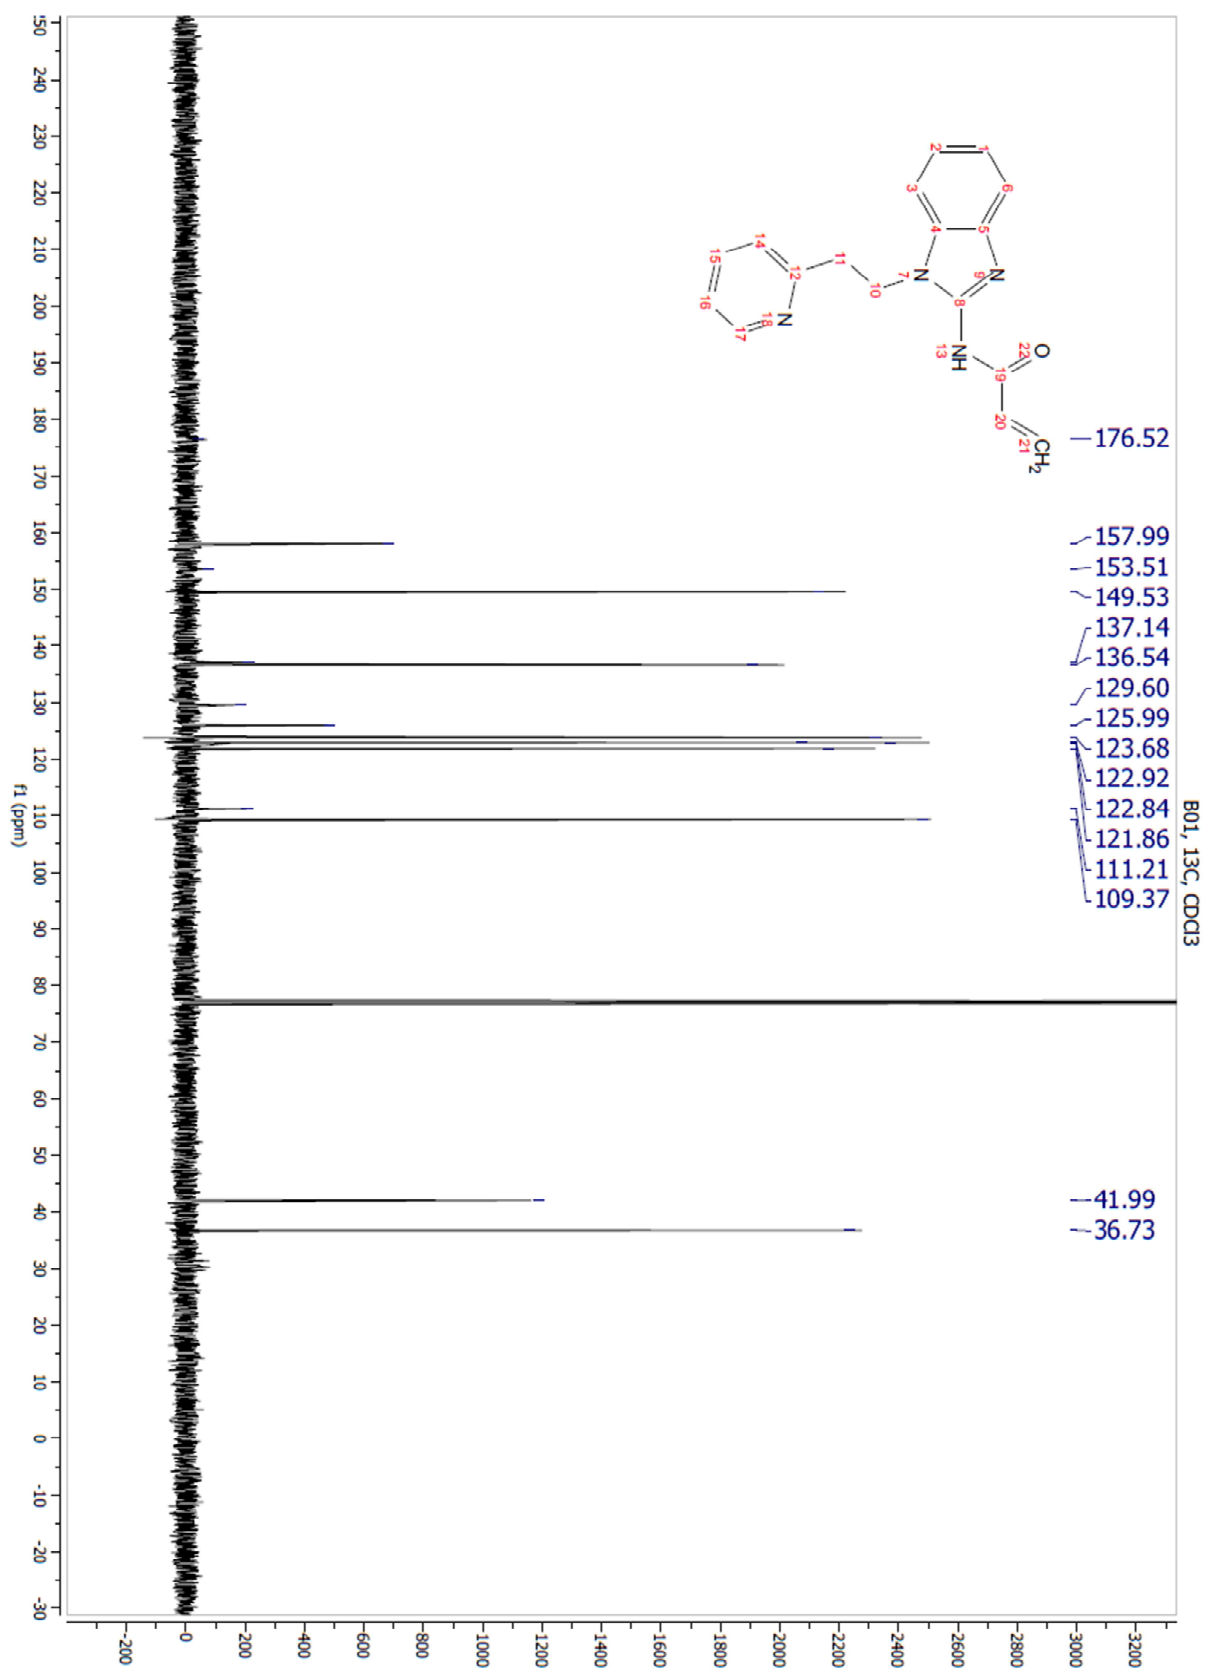

## Supplementary References

- (1) Kozakov, D.; Grove, L. E.; Hall, D. R.; Bohnuud, T.; Mottarella, S. E.; Luo, L.; Xia, B.; Beglov, D.; Vajda, S. The FTMap Family of Web Servers for Determining and Characterizing Ligand-Binding Hot Spots of Proteins. *Nat. Protoc.* **2015**, 10 (5), 733–755.
- (2) Joung, J. Y.; Lee, H. Y.; Park, J.; Lee, J.-Y.; Chang, B. H.; No, K. T.; Nam, K.-Y.; Hwang, J. S. Identification of Novel Rab27a/Melanophilin Blockers by Pharmacophore-Based Virtual Screening. *Appl. Biochem. Biotechnol.* **2014**, 172 (4), 1882–1897.
- (3) Johnson, J. L.; Ramadass, M.; He, J.; Brown, S. J.; Zhang, J.; Abgaryan, L.; Biris, N.; Gavathiotis, E.; Rosen, H.; Catz, S. D. Identification of Neutrophil Exocytosis Inhibitors (Nexinhibs), Small Molecule Inhibitors of Neutrophil Exocytosis and Inflammation: Druggability of the Small GTPase Rab27a. *J. Biol. Chem.* **2016**, 291 (50), 25965–25982.
- (4) Baell, J.; Walters, M. A. Chemistry: Chemical Con Artists Foil Drug Discovery. *Nature* **2014**, 513 (7519), 481–483.
- (5) Tropea, J. E.; Cherry, S.; Waugh, D. S. Expression and Purification of Soluble His6-Tagged TEV Protease. *Methods Mol. Biol.* **2009**, 498, 297–307.
- (6) Beilsten-Edmands, J.; Winter, G.; Gildea, R.; Parkhurst, J.; Waterman, D., and Evans, G. Scaling diffraction data in the DIALS software package: algorithms and new approaches for multi-crystal scaling. *Acta Crystallogr.* **2020**, Sect. D76, 385–399.
- (7) McCoy, A. J., Grosse-Kunstleve, R. W., Adams, P. D., Winn, M. D., Storoni, L. C., and Read, R. J. “Phaser crystallographic software,” *J. Appl. Crystallogr.* **2007**, 40 (4), 658–674.
- (8) Emsley, P., Lohkamp, B., Scott, W. G., and Cowtan, K. Features and development of Coot, *Acta Crystallogr.* **2010**, Sect. D Biol. Crystallogr., 66 (4), 486–501.
- (9) Murshudov, G. N., Skubák, P., Lebedev, A. A., Pannu, N. S., Steiner, R. A., Nicholls, R. A., Winn, M. D., Long, F., Vagin, A. A. REFMAC 5 for the refinement of macromolecular crystal structures, *Acta Crystallogr.*, **2011**, Sect. D Biol. Crystallogr., 67 (4), 355–367.
- (10) V. B. Chen et al., MolProbity: All-atom structure validation for macromolecular crystallography, *Acta Crystallogr.* **2010**, Sect. D Biol. Crystallogr., 66 (1), 12–21.
- (11) Huang, J., Rauscher, S., Nawrocki, G., Ran, T., Feig, M., de Groot, B. L., Grubmüller, H., MacKerell, A. D. JrCHARMM36m: an improved force field for folded and intrinsically disordered proteins. *Nature Methods* **2017**, 14, 71–73.
- (12) Jorgensen, W. L., Chandrasekhar, J., Madura, J. D., Impey, R. W. & Klein, M. L. Comparison of simple potential functions for simulating liquid water. *J Chem Phys* **1983**, 79, 926.
- (13) Bussi, G., Donadio, D. & Parrinello, M. Canonical sampling through velocity rescaling. *J Chem Phys* **2007**, 126, 14101–14107.

- (14) Berendsen, H. J. C., Postma, J. P. M., van Gunsteren, W. F., a DiNola & Haak, J. R. Molecular dynamics with coupling to an external bath. *J Chem Phys* **1984**, 81, 3684–3690.
- (15) Darden, T., York, D. & Pedersen, L. Particle mesh Ewald: An  $N \log(N)$  method for Ewald sums in large systems. *J Chem Phys* **1993**, 98, 10089.
- (16) Hess, B., Bekker, H., Berendsen, H. J. C. & Fraaije, J. G. E. M. LINCS: A linear constraint solver for molecular simulations. *J Comp Chem* **1997**, 18, 1463–1472.
- (17) Abraham, M. J., Murtolad, T., Schulzb, R., Pall, S., Smith, J.C., Hessa, B., Lindahl, E. GROMACS: High performance molecular simulations through multi-level parallelism from laptops to supercomputers. *SoftwareX* **2015**, 1–2, 19–25.
- (18) Craven, G. B.; Affron, D. P.; Allen, C. E.; Matthies, S.; Greener, J. G.; Morgan, R. M. L.; Tate, E. W.; Armstrong, A.; Mann, D. J. High-Throughput Kinetic Analysis for Target-Directed Covalent Ligand Discovery. *Angew. Chemie - Int. Ed.* **2018**, 57 (19), 5257–5261.
